# Supplementary material
Source: HighWire-hosted journal article supplement (https://bmjopen.bmj.com/content/12/6/e059311)
Supplement: inline-supplementary-material-1 [file inline-supplementary-material-1.pdf]

## SUPPLEMENTARY METHODS

### **Additional inclusion/exclusion criteria**

Individuals were required to have been registered with their general practice for at least 1 year following their first primary care health contact and before their first study drug prescription (start date). Patients with a first prescription for more than one of the study drugs on the same day were excluded, and those with a first prescription for different study drugs on different days were assigned to the cohort of the first prescribed drug. We also excluded new users of apixaban/rivaroxaban if the daily dose of the first prescription was not 5 mg/10 mg (apixaban) or 15 mg/20 mg (rivaroxaban). We also excluded patients with evidence of another recent indication for oral anticoagulation (OAC) initiation, i.e. those with a record of venous thromboembolism or orthopaedic arthroplasty in the 3 months before the first prescription for the study drug or in the week after.

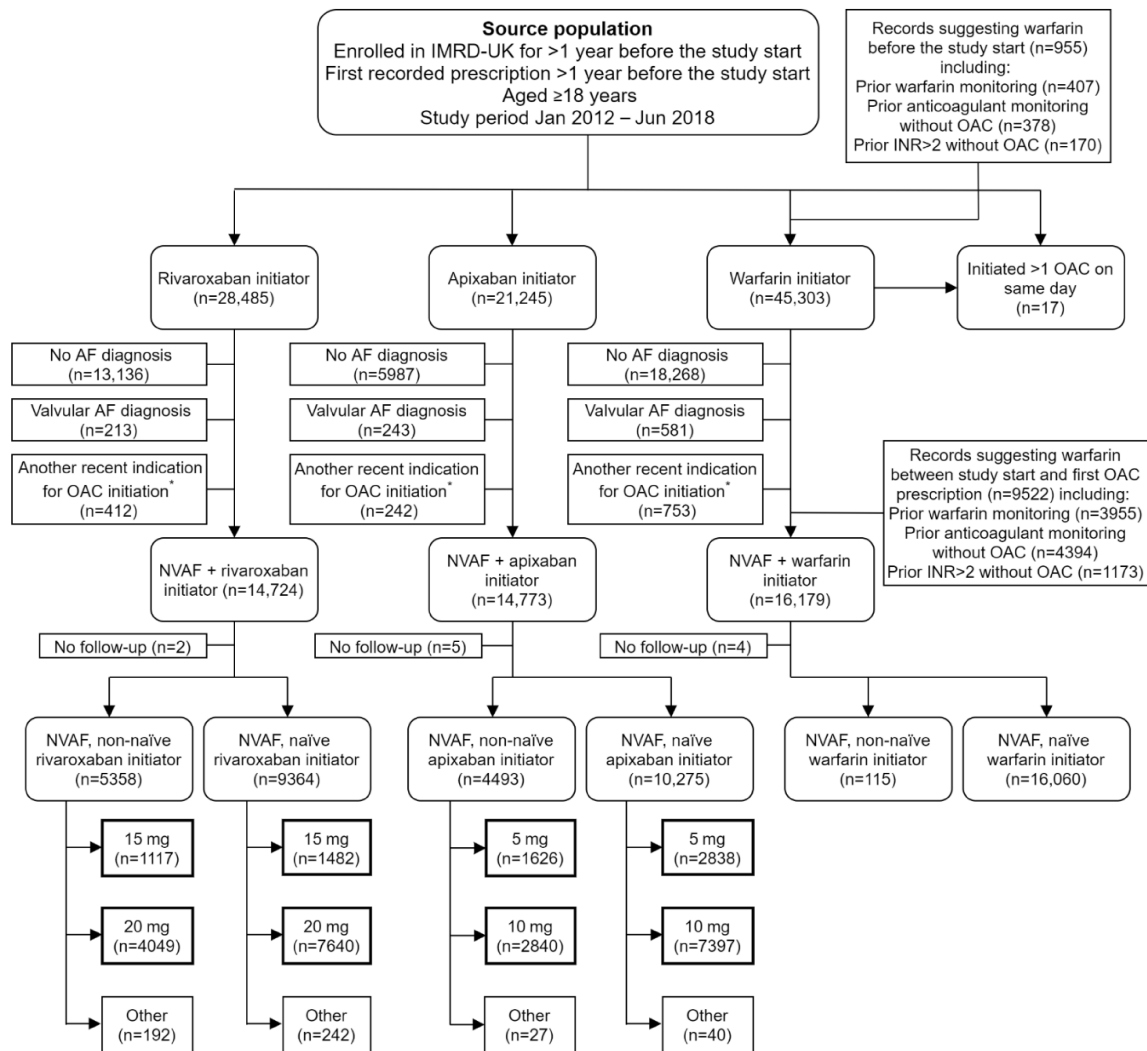

**Supplementary Figure 1.** Identification of the study cohorts.

\* A record of VTE or orthopaedic arthroplasty in the 3 months before the first OAC prescription or in the week after.

AF, atrial fibrillation; DVT, deep vein thrombosis; INR, international normalised ratio; NVAF, non-valvular atrial fibrillation; OAC, oral anticoagulation, PE, pulmonary embolism, VTE, venous thromboembolism

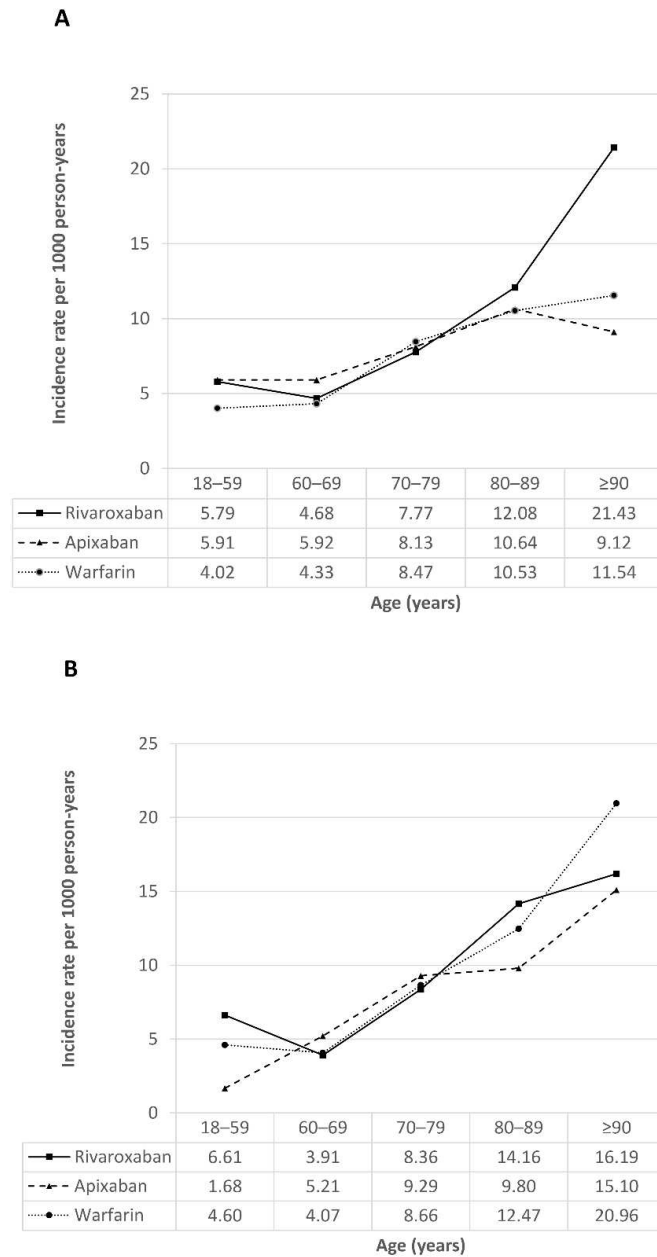

**Supplementary Figure 2.** Crude incidence of IS/SE per 1000 person-years by age in (A) males, (B) females.

IS/SE, ischemic stroke/systemic embolism

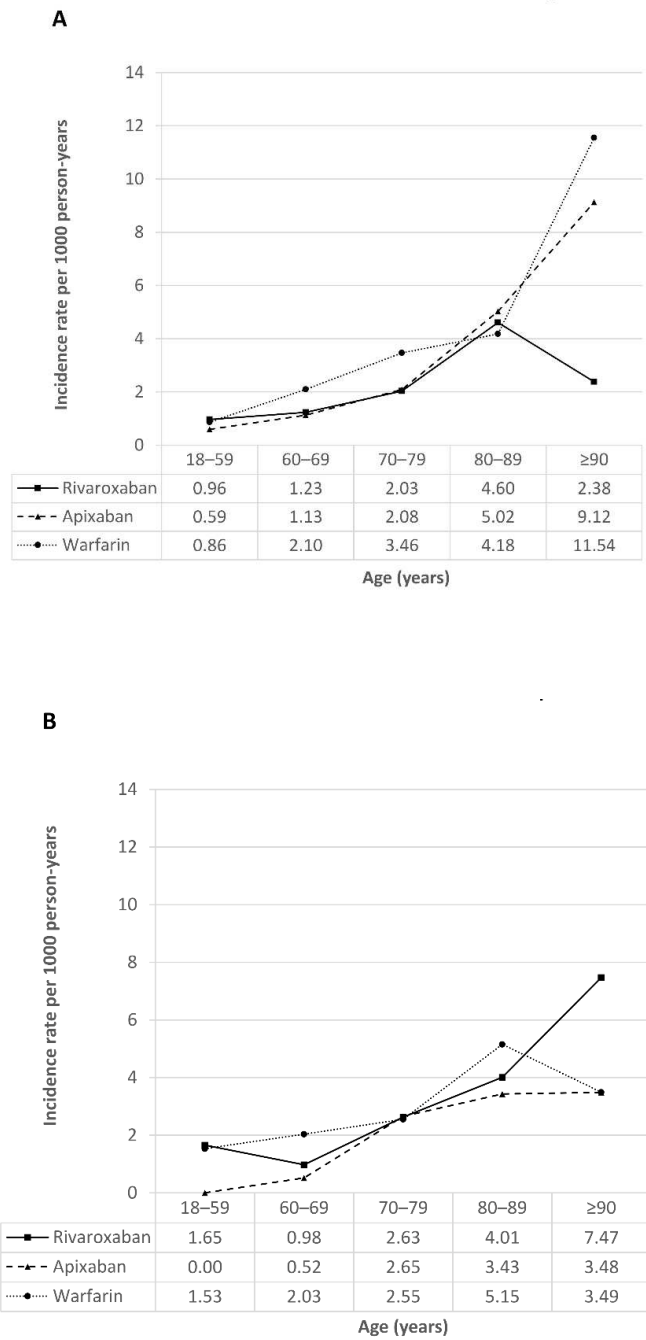

**Supplementary Figure 3.** Crude incidence of ICB per 1000 person years in (A) males, (B) females. ICB, intracranial bleeding

**Supplementary Table 1.** Appropriate/inappropriate DOAC dosing\* (first DOAC prescription) in patients with NVAF **prescribed** standard/reduced apixaban/rivaroxaban.

|                 | <b>DOAC prescribed</b>                                                         |                                                                             |                                                                                   |                                                                                 |
|-----------------|--------------------------------------------------------------------------------|-----------------------------------------------------------------------------|-----------------------------------------------------------------------------------|---------------------------------------------------------------------------------|
|                 | <b>Apixaban<br/>standard dose<br/>(prescribed dose)<br/>N=10,237<br/>n (%)</b> | <b>Apixaban<br/>reduced dose<br/>N=4464<br/>(prescribed dose)<br/>n (%)</b> | <b>Rivaroxaban<br/>standard dose<br/>N=11,689<br/>(prescribed dose)<br/>n (%)</b> | <b>Rivaroxaban<br/>standard dose<br/>N=2599<br/>(prescribed dose)<br/>n (%)</b> |
| Underdosed      | 0 (0)                                                                          | 2339 (52.4)                                                                 | 0 (0)                                                                             | 888 (34.2)                                                                      |
| Correct dose    | 9910 (96.8)                                                                    | 1907 (42.7)                                                                 | 10,882 (93.1)                                                                     | 1708 (65.7)                                                                     |
| Overdosed       | 196 (1.9)                                                                      | 0 (0)                                                                       | 806 (6.9)                                                                         | 0 (0)                                                                           |
| Contraindicated | 131 (1.3)                                                                      | 218 (4.9)                                                                   | 1 (0.01)                                                                          | 3 (0.1)                                                                         |

\*Based on the instructions on the respective drug label.

DOAC, direct oral anticoagulant; NVAF, non-valvular atrial fibrillation

**Supplementary Table 2.** Appropriate/inappropriate DOAC dosing\* (first DOAC prescription) in patients with NVAF according to their **eligibility** to receive a standard/reduced dose.

| Daily DOAC dose prescribed              | Patient eligibility*       |                           |                                       | Total           |
|-----------------------------------------|----------------------------|---------------------------|---------------------------------------|-----------------|
|                                         | Eligible for Standard dose | Eligible for Reduced dose | Ineligible due to a contra-indication |                 |
| <b>Rivaroxaban</b>                      | <b>N=11,770</b>            | <b>N=2514</b>             | <b>N=4</b>                            | <b>N=14,288</b> |
| Recommended                             | 10,882 (92.5)              | 1708 (67.9)               | NA                                    | 12,590 (88.1)   |
| Lower than recommended                  | 888 (7.5)                  | 0 (0.0)                   | NA                                    | 888 (6.2)       |
| Higher than recommended                 | 0 (0.0)                    | 806 (32.1)                | NA                                    | 806 (5.6)       |
| Prescribed a DOAC when contraindicated  | NA                         | NA                        | 4 (100.0)                             | 4 (0.0)         |
| Higher than recommended                 | 0 (0.0)                    | 806 (32.1)                | 4 (100.0)                             | 810 (5.7)       |
| <b>Apixaban</b>                         | <b>N=12,249</b>            | <b>N=2103</b>             | <b>N=349</b>                          | <b>N=14,701</b> |
| Recommended                             | 9910 (80.9)                | 1907 (90.7)               | NA                                    | 11,817 (80.4)   |
| Lower than recommended                  | 2339 (19.1)                | 0 (0.0)                   | NA                                    | 2339 (15.9)     |
| Higher than recommended                 | 0 (0.0)                    | 196 (9.3)                 | NA                                    | 196 (1.3)       |
| Prescribed a DOAC when contraindicated  | NA                         | NA                        | 349 (100.0)                           | 349 (2.4)       |
| Higher than recommended/contraindicated | 0 (0.0)                    | 196 (9.3)                 | 349 (100.0)                           | 545 (3.7)       |

Data are n (column %).

\*Based on the instructions on the respective drug label.

DOAC, direct oral anticoagulant; NA, not applicable; NVAF, non-valvular atrial fibrillation

**Supplementary Table 3.** ORs (95% CI) for risk of the **primary outcomes** of IS/SE and ICB, associated with apixaban vs. warfarin and with rivaroxaban vs. warfarin, according to dose classification.

|                                           | Apixaban vs. warfarin |                         |                         | Rivaroxaban vs. warfarin |                         |                         |
|-------------------------------------------|-----------------------|-------------------------|-------------------------|--------------------------|-------------------------|-------------------------|
|                                           | Exposed cases, n (%)  | Exposed controls, n (%) | OR (95% CI)             | Exposed cases, n (%)     | Exposed controls, n (%) | OR (95% CI)             |
| <b>Ischemic stroke/systemic embolism*</b> |                       |                         |                         |                          |                         |                         |
| <b>Any dose</b>                           | <b>185 (22.7)</b>     | <b>594 (24.3)</b>       | <b>1.14 (0.90–1.45)</b> | <b>187 (22.9)</b>        | <b>624 (25.5)</b>       | <b>1.11 (0.87–1.40)</b> |
| Appropriate dose                          | 146 (17.9)            | 451 (18.5)              | 1.19 (0.92–1.52)        | 150 (18.4)               | 528 (21.6)              | 1.07 (0.83–1.37)        |
| Inappropriate dose                        | 39 (4.8)              | 143 (5.9)               | 1.01 (0.67–1.51)        | 35 (4.3)                 | 96 (3.9)                | 1.21 (0.78–1.88)        |
| <b>Reduced dose</b>                       | <b>56 (6.9)</b>       | <b>228 (9.3)</b>        | <b>0.85 (0.60–1.20)</b> | <b>46 (5.6)</b>          | <b>153 (6.3)</b>        | <b>1.06 (0.72–1.56)</b> |
| Appropriate dose                          | 26 (3.2)              | 97 (4.0)                | 0.86 (0.53–1.40)        | 25 (3.1)                 | 95 (3.9)                | 1.00 (0.61–1.64)        |
| Inappropriate dose (underdosed)           | 30 (3.7)              | 131 (5.4)               | 0.84 (0.54–1.32)        | 21 (2.6)                 | 58 (2.4)                | 1.16 (0.67–2.03)        |
| <b>Standard dose</b>                      | <b>129 (15.8)</b>     | <b>366 (15.0)</b>       | <b>1.33 (1.03–1.74)</b> | <b>139 (17.1)</b>        | <b>471 (19.3)</b>       | <b>1.10 (0.85–1.42)</b> |
| Appropriate dose                          | 120 (14.7)            | 354 (14.5)              | 1.29 (0.99–1.69)        | 125 (15.3)               | 433 (17.7)              | 1.08 (0.83–1.41)        |
| Inappropriate dose (overdosed)            | 9 (1.1)               | 12 (0.5)                | 2.72 (1.06–6.95)        | 14 (1.7)                 | 38 (1.6)                | 1.25 (0.65–2.40)        |
| <b>Intracranial bleeding†</b>             |                       |                         |                         |                          |                         |                         |
| <b>Any dose</b>                           | <b>58 (20.3)</b>      | <b>281 (24.6)</b>       | <b>0.62 (0.42–0.91)</b> | <b>67 (23.4)</b>         | <b>263 (23)</b>         | <b>0.86 (0.60–1.25)</b> |
| Appropriate dose                          | 48 (16.8)             | 218 (19.1)              | 0.67 (0.44–1.00)        | 54 (18.9)                | 226 (19.8)              | 0.81 (0.55–1.20)        |
| Inappropriate dose                        | 10 (3.5)              | 63 (5.5)                | 0.45 (0.21–0.95)        | 13 (4.5)                 | 37 (3.2)                | 1.14 (0.56–2.31)        |
| <b>Reduced dose</b>                       | <b>23 (8.0)</b>       | <b>101 (8.8)</b>        | <b>0.63 (0.36–1.09)</b> | <b>21 (7.3)</b>          | <b>79 (6.9)</b>         | <b>0.87 (0.49–1.52)</b> |
| Appropriate dose                          | 14 (4.9)              | 45 (3.9)                | 0.76 (0.38–1.52)        | 12 (4.2)                 | 52 (4.5)                | 0.77 (0.39–1.55)        |
| Inappropriate dose (underdosed)           | 9 (3.1)               | 56 (4.9)                | 0.50 (0.23–1.09)        | 9 (3.1)                  | 27 (2.4)                | 1.02 (0.45–2.34)        |
| <b>Standard dose</b>                      | <b>35 (12.2)</b>      | <b>180 (15.7)</b>       | <b>0.61 (0.39–0.95)</b> | <b>46 (16.1)</b>         | <b>184 (16.1)</b>       | <b>0.87 (0.57–1.31)</b> |
| Appropriate dose                          | 34 (11.9)             | 173 (15.1)              | 0.63 (0.41–0.99)        | 42 (14.7)                | 174 (15.2)              | 0.83 (0.54–1.26)        |
| Inappropriate dose (overdosed)            | 1 (0.3)               | 7 (0.6)                 | 0.21 (0.02–1.95)        | 4 (1.4)                  | 10 (0.9)                | 1.51 (0.44–5.19)        |

\*ORs were adjusted for matching factors (OAC naive at start date, sex, and year of birth), frailty, use of health services (hospitalizations, referrals), BMI, alcohol abuse, polymedication, history of ischemic stroke, myocardial infarction, peripheral artery disease, tachycardia, hyperlipidaemia, gastrointestinal diseases, osteoarthritis, asthma, obesity, and use of gastroprotective drugs, antiplatelets, other anticoagulants, oral antidiabetics, anti-infectives, and antipsychotics.

†ORs were adjusted for matching factors (OAC naive at start date, sex, and year of birth), frailty, hospitalizations in the year before the index date, BMI, history of haemorrhagic stroke, osteoarthritis, asthma, Parkinson's disease, dementia/psychosis, and use of gastroprotective drugs, antidepressants, injectable steroids, and digoxin.

BMI, body mass index; CI, confidence interval; IS/SE, ischemic stroke/systemic embolism; OR, odds ratio

**Supplementary Table 4.** ORs (95% CI) for risk of the **secondary outcomes** of haemorrhagic stroke, myocardial infarction and all-cause mortality, associated with apixaban vs. warfarin and with rivaroxaban vs. warfarin, according to dose classification.

|                                 | Apixaban vs. warfarin |                         |                         | Rivaroxaban vs. warfarin |                         |                         |
|---------------------------------|-----------------------|-------------------------|-------------------------|--------------------------|-------------------------|-------------------------|
|                                 | Exposed cases, n (%)  | Exposed controls, n (%) | OR* (95% CI)            | Exposed cases, n (%)     | Exposed controls, n (%) | OR (95% CI)             |
| <b>Haemorrhagic stroke*</b>     |                       |                         |                         |                          |                         |                         |
| <b>Any dose</b>                 | <b>35 (21.1)</b>      | <b>149 (22.4)</b>       | <b>0.83 (0.50–1.36)</b> | <b>45 (27.1)</b>         | <b>158 (23.8)</b>       | <b>1.15 (0.71–1.84)</b> |
| Appropriate dose                | 30 (18.1)             | 121 (18.2)              | 0.89 (0.53–1.50)        | 35 (21.1)                | 140 (21.1)              | 0.98 (0.59–1.63)        |
| Inappropriate dose              | 5 (3.0)               | 28 (4.2)                | 0.55 (0.19–1.59)        | 10 (6.0)                 | 18 (2.7)                | 2.39 (1.00–5.72)        |
| <b>Reduced dose</b>             | <b>11 (6.6)</b>       | <b>46 (6.9)</b>         | <b>0.68 (0.31–1.48)</b> | <b>14 (8.4)</b>          | <b>39 (5.9)</b>         | <b>1.35 (0.66–2.79)</b> |
| Appropriate dose                | 6 (3.6)               | 22 (3.3)                | 0.64 (0.23–1.77)        | 7 (4.2)                  | 24 (3.6)                | 1.02 (0.40–2.64)        |
| Inappropriate dose (underdosed) | 5 (3.0)               | 24 (3.6)                | 0.68 (0.23–2.00)        | 7 (4.2)                  | 15 (2.3)                | 1.83 (0.67–4.96)        |
| <b>Standard dose</b>            | <b>24 (14.5)</b>      | <b>103 (15.5)</b>       | <b>0.91 (0.52–1.59)</b> | <b>31 (18.7)</b>         | <b>119 (17.9)</b>       | <b>1.07 (0.63–1.81)</b> |
| Appropriate dose                | 24 (14.5)             | 99 (14.9)               | 0.96 (0.55–1.69)        | 28 (16.9)                | 116 (17.5)              | 0.97 (0.56–1.66)        |
| Inappropriate dose (overdosed)  | 0 (0)                 | 4 (0.6)                 | –                       | 3 (1.8)                  | 3 (0.5)                 | 5.77 (1.02–32.54)       |
| <b>Myocardial infarction†</b>   |                       |                         |                         |                          |                         |                         |
| <b>Any dose</b>                 | <b>179 (29.4)</b>     | <b>476 (26.1)</b>       | <b>1.37 (1.04–1.81)</b> | <b>160 (26.3)</b>        | <b>468 (25.6)</b>       | <b>1.30 (0.98–1.73)</b> |
| Appropriate dose                | 130 (29.4)            | 371 (20.3)              | 1.29 (0.96–1.73)        | 118 (19.4)               | 393 (21.5)              | 1.21 (0.89–1.64)        |
| Inappropriate dose              | 49 (8.0)              | 104 (5.7)               | 1.73 (1.12–2.67)        | 38 (6.2)                 | 72 (3.9)                | 1.68 (1.04–2.70)        |
| <b>Reduced dose</b>             | <b>73 (12.0)</b>      | <b>166 (9.1)</b>        | <b>1.63 (1.12–2.38)</b> | <b>59 (9.7)</b>          | <b>108 (5.9)</b>        | <b>1.72 (1.14–2.60)</b> |
| Appropriate dose                | 30 (4.9)              | 69 (3.8)                | 1.58 (0.93–2.68)        | 37 (6.1)                 | 66 (3.6)                | 1.77 (1.07–2.92)        |
| Inappropriate dose (underdosed) | 43 (7.1)              | 97 (5.3)                | 1.69 (1.07–2.67)        | 22 (3.6)                 | 42 (2.3)                | 1.69 (0.93–3.05)        |
| <b>Standard dose</b>            | <b>106 (16.4)</b>     | <b>309 (16.9)</b>       | <b>1.27 (0.93–1.73)</b> | <b>97 (15.9)</b>         | <b>357 (19.5)</b>       | <b>1.15 (0.84–1.57)</b> |
| Appropriate dose                | 100 (16.4)            | 302 (16.5)              | 1.22 (0.89–1.68)        | 81 (13.3)                | 327 (17.9)              | 1.07 (0.77–1.50)        |
| Inappropriate dose (overdosed)  | 6 (1.0)               | 7 (0.4)                 | 2.67 (0.81–8.79)        | 16 (2.6)                 | 30 (1.6)                | 1.76 (0.88–3.53)        |
| <b>All-cause mortality‡</b>     |                       |                         |                         |                          |                         |                         |
| <b>Any dose</b>                 | <b>1621 (23.3)</b>    | <b>1840 (26.4)</b>      | <b>1.17 (1.05–1.31)</b> | <b>1647 (23.7)</b>       | <b>1902 (27.3)</b>      | <b>1.32 (1.18–1.47)</b> |
| Appropriate dose                | 1056 (15.2)           | 1333 (19.2)             | 1.08 (0.95–1.22)        | 1194 (17.2)              | 1498 (21.5)             | 1.25 (1.11–1.41)        |
| Inappropriate dose              | 562 (8.1)             | 507 (7.3)               | 1.41 (1.20–1.66)        | 440 (6.3)                | 386 (5.5)               | 1.58 (1.33–1.89)        |
| <b>Reduced dose</b>             | <b>937 (13.5)</b>     | <b>822 (11.8)</b>       | <b>1.39 (1.22–1.60)</b> | <b>679 (9.8)</b>         | <b>551 (7.9)</b>        | <b>1.60 (1.37–1.86)</b> |
| Appropriate dose                | 458 (6.6)             | 371 (5.3)               | 1.38 (1.15–1.65)        | 395 (5.7)                | 322 (4.6)               | 1.51 (1.25–1.82)        |
| Inappropriate dose (underdosed) | 479 (6.9)             | 451 (6.5)               | 1.42 (1.20–1.68)        | 284 (4.1)                | 229 (3.3)               | 1.76 (1.42–2.18)        |
| <b>Standard dose</b>            | <b>681 (9.8)</b>      | <b>1018 (14.6)</b>      | <b>0.98 (0.86–1.13)</b> | <b>955 (13.7)</b>        | <b>1333 (19.2)</b>      | <b>1.20 (1.06–1.36)</b> |
| Appropriate dose                | 598 (8.6)             | 962 (13.8)              | 0.94 (0.82–1.09)        | 799 (11.5)               | 1176 (16.9)             | 1.17 (1.02–1.33)        |
| Inappropriate dose (overdosed)  | 83 (1.2)              | 56 (0.8)                | 1.53 (1.04–2.26)        | 156 (2.2)                | 157 (2.3)               | 1.40 (1.08–1.82)        |



\*ORs were adjusted for the matching factors (OAC naive at start date, sex, and year of birth), frailty, hospitalizations in the year before the index date, BMI, history of haemorrhagic stroke, osteoarthritis, asthma, Parkinson's disease, dementia/psychosis, and use of gastroprotective drugs, antidepressants, injectable steroids, and digoxin.

†ORs were adjusted for the matching factors (OAC naive at start date, sex, and year of birth), frailty, health services utilization (hospitalizations, referrals), BMI, alcohol abuse, polymedication, history of ischemic stroke, myocardial infarction, peripheral artery disease, tachycardia, hyperlipidaemia, gastrointestinal diseases, osteoarthritis, asthma, obesity, and use of gastroprotective drugs, antiplatelets, other anticoagulants, oral antidiabetics, anti-infectives, and antipsychotics.

‡ORs were adjusted for matching factors (naive at start date, sex, and year of birth), polymedication, frailty, health services utilization, alcohol, BMI, history of heart failure, cancer, diabetes, peripheral artery disease, stroke, MI, and use of oral steroids, statins, antihypertensives, parenteral anticoagulants, other DOAC, digoxin, and CYP-inducing drugs.

BMI, body mass index; CI, confidence interval; CYP, cytochrome P450; IS/SE, ischemic stroke/systemic embolism; OR, odds ratio

**Supplementary Table 5.** ORs (95% CI) for the risk of study outcomes, associated with apixaban vs. warfarin and with rivaroxaban vs. warfarin, according to dose classification, in the CKD subgroup.

|                                           | Apixaban vs. warfarin |                         |                         | Rivaroxaban vs. warfarin |                         |                         |
|-------------------------------------------|-----------------------|-------------------------|-------------------------|--------------------------|-------------------------|-------------------------|
|                                           | Exposed cases, n (%)  | Exposed controls, n (%) | OR* (95% CI)            | Exposed cases, n (%)     | Exposed controls, n (%) | OR (95% CI)             |
| <b>Ischemic stroke/systemic embolism*</b> |                       |                         |                         |                          |                         |                         |
| <b>Any dose</b>                           | <b>78 (24.5)</b>      | <b>253 (27.8)</b>       | <b>1.00 (0.68–1.47)</b> | <b>67 (21)</b>           | <b>225 (24.7)</b>       | <b>0.91 (0.61–1.36)</b> |
| Appropriate dose                          | 57 (17.9)             | 171 (18.8)              | 1.10 (0.72–1.67)        | 44 (13.8)                | 168 (18.5)              | 0.83 (0.53–1.31)        |
| Inappropriate dose                        | 21 (6.6)              | 82 (9.0)                | 0.79 (0.44–1.42)        | 22 (6.9)                 | 57 (6.3)                | 1.05 (0.58–1.92)        |
| <b>Standard dose</b>                      | <b>44 (13.8)</b>      | <b>114 (12.5)</b>       | <b>1.34 (0.84–2.12)</b> | <b>33 (10.4)</b>         | <b>112 (12.3)</b>       | <b>0.88 (0.54–1.44)</b> |
| Appropriate dose                          | 37 (11.6)             | 106 (11.6)              | 1.22 (0.75–1.98)        | 19 (6)                   | 74 (8.1)                | 0.76 (0.41–1.39)        |
| Inappropriate dose                        | 7 (2.2)               | 8 (0.9)                 | 2.82 (0.89–8.92)        | 14 (4.4)                 | 38 (4.2)                | 1.11 (0.55–2.23)        |
| <b>Reduced dose</b>                       | <b>34 (10.7)</b>      | <b>139 (15.3)</b>       | <b>0.72 (0.44–1.19)</b> | <b>33 (10.4)</b>         | <b>113 (12.4)</b>       | <b>0.89 (0.53–1.48)</b> |
| Appropriate dose                          | 20 (6.3)              | 65 (7.1)                | 0.91 (0.49–1.71)        | 25 (7.9)                 | 94 (10.3)               | 0.88 (0.51–1.53)        |
| Inappropriate dose                        | 14 (4.4)              | 74 (8.1)                | 0.57 (0.29–1.12)        | 8 (2.5)                  | 19 (2.1)                | 0.95 (0.36–2.50)        |
| <b>Intracranial bleeding†</b>             |                       |                         |                         |                          |                         |                         |
| <b>Any dose</b>                           | <b>29 (25.4)</b>      | <b>124 (26.8)</b>       | <b>0.76 (0.41–1.41)</b> | <b>25 (21.9)</b>         | <b>110 (23.8)</b>       | <b>0.82 (0.44–1.52)</b> |
| Appropriate dose                          | 22 (19.3)             | 91 (19.7)               | 0.79 (0.41–1.52)        | 16 (14.0)                | 90 (19.4)               | 0.64 (0.32–1.29)        |
| Inappropriate dose                        | 7 (6.1)               | 33 (7.1)                | 0.72 (0.27–1.92)        | 9 (7.9)                  | 20 (4.3)                | 1.61 (0.62–4.15)        |
| <b>Standard dose</b>                      | <b>12 (10.5)</b>      | <b>66 (14.3)</b>        | <b>0.67 (0.31–1.45)</b> | <b>8 (7.0)</b>           | <b>48 (10.4)</b>        | <b>0.68 (0.28–1.66)</b> |
| Appropriate dose                          | 11 (9.6)              | 29 (6.3)                | 0.70 (0.32–1.53)        | 4 (3.5)                  | 38 (8.2)                | 0.42 (0.13–1.35)        |
| Inappropriate dose                        | 1 (0.9)               | 4 (0.9)                 | 0.47 (0.04–4.92)        | 4 (3.5)                  | 10 (2.2)                | 1.63 (0.45–5.93)        |
| <b>Reduced dose</b>                       | <b>17 (14.9)</b>      | <b>58 (12.5)</b>        | <b>0.88 (0.41–1.87)</b> | <b>17 (14.9)</b>         | <b>62 (13.4)</b>        | <b>0.92 (0.45–1.88)</b> |
| Appropriate dose                          | 11 (9.6)              | 29 (6.3)                | 0.95 (0.38–2.38)        | 12 (10.5)                | 52 (11.2)               | 0.79 (0.36–1.74)        |
| Inappropriate dose                        | 6 (5.3)               | 29 (6.3)                | 0.80 (0.29–2.26)        | 5 (4.4)                  | 10 (2.2)                | 1.61 (0.46–5.68)        |
| <b>Haemorrhagic stroke†</b>               |                       |                         |                         |                          |                         |                         |
| <b>Any dose</b>                           | <b>14 (22.6)</b>      | <b>66 (25.3)</b>        | <b>0.82 (0.35–1.94)</b> | <b>16 (25.8)</b>         | <b>51 (19.5)</b>        | <b>1.42 (0.61–3.28)</b> |
| Appropriate dose                          | 10 (16.1)             | 49 (18.8)               | 0.86 (0.34–2.20)        | 10 (16.1)                | 44 (16.9)               | 0.99 (0.39–2.52)        |
| Inappropriate dose                        | 4 (6.5)               | 17 (6.5)                | 0.80 (0.20–3.16)        | 6 (9.7)                  | 7 (2.7)                 | 4.94 (1.26–19.38)       |
| <b>Standard dose</b>                      | <b>7 (11.3)</b>       | <b>37 (14.2)</b>        | <b>0.90 (0.31–2.58)</b> | <b>6 (9.7)</b>           | <b>23 (8.8)</b>         | <b>1.30 (0.41–4.12)</b> |
| Appropriate dose                          | 7 (11.3)              | 34 (13.2)               | 1.15 (0.39–3.35)        | 3 (4.8)                  | 20 (7.8)                | 0.71 (0.17–3.01)        |
| Inappropriate dose                        | 0 (0)                 | 0 (0)                   | –                       | 3 (4.8)                  | 3 (1.2)                 | 6.51 (0.98–43.40)       |
| <b>Reduced dose</b>                       | <b>7 (11.3)</b>       | <b>29 (11.1)</b>        | <b>0.75 (0.25–2.30)</b> | <b>10 (16.1)</b>         | <b>28 (10.7)</b>        | <b>1.51 (0.56–4.07)</b> |
| Appropriate dose                          | 3 (4.8)               | 15 (5.8)                | 0.45 (0.10–2.08)        | 7 (11.3)                 | 24 (9.3)                | 1.14 (0.38–3.44)        |

|                               | Apixaban vs. warfarin |                         |                         | Rivaroxaban vs. warfarin |                         |                         |
|-------------------------------|-----------------------|-------------------------|-------------------------|--------------------------|-------------------------|-------------------------|
|                               | Exposed cases, n (%)  | Exposed controls, n (%) | OR* (95% CI)            | Exposed cases, n (%)     | Exposed controls, n (%) | OR (95% CI)             |
| Inappropriate dose            | 4 (6.5)               | 14 (5.4)                | 1.12 (0.28–4.49)        | 3 (4.8)                  | 4 (1.6)                 | 3.48 (0.57–21.39)       |
| <b>Myocardial infarction*</b> |                       |                         |                         |                          |                         |                         |
| <b>Any dose</b>               | <b>71 (26.0)</b>      | <b>189 (28.3)</b>       | <b>1.30 (0.84–2.03)</b> | <b>83 (30.4)</b>         | <b>171 (25.6)</b>       | <b>1.55 (1.01–2.40)</b> |
| Appropriate dose              | 41 (15.0)             | 125 (18.8)              | 1.13 (0.68–1.86)        | 54 (19.8)                | 119 (17.9)              | 1.44 (0.89–2.34)        |
| Inappropriate dose            | 30 (11.0)             | 63 (9.5)                | 1.72 (0.95–3.10)        | 28 (10.3)                | 51 (7.7)                | 1.74 (0.96–3.15)        |
| <b>Standard dose</b>          | <b>27 (9.9)</b>       | <b>84 (12.6)</b>        | <b>1.18 (0.67–2.06)</b> | <b>33 (12.1)</b>         | <b>83 (12.5)</b>        | <b>1.30 (0.76–2.24)</b> |
| Appropriate dose              | 23 (8.4)              | 80 (12.0)               | 1.03 (0.57–1.87)        | 17 (6.2)                 | 53 (8.0)                | 1.05 (0.54–2.07)        |
| Inappropriate dose            | 4 (1.5)               | 4 (0.6)                 | 4.09 (0.87–19.22)       | 16 (5.9)                 | 30 (4.5)                | 1.73 (0.82–3.65)        |
| <b>Reduced dose</b>           | <b>44 (16.1)</b>      | <b>104 (15.6)</b>       | <b>1.45 (0.86–2.43)</b> | <b>49 (17.9)</b>         | <b>87 (13.1)</b>        | <b>1.79 (1.07–2.98)</b> |
| Appropriate dose              | 18 (6.6)              | 45 (6.8)                | 1.30 (0.65–2.60)        | 37 (13.6)                | 66 (9.9)                | 1.79 (1.02–3.16)        |
| Inappropriate dose            | 26 (9.5)              | 59 (8.9)                | 1.59 (0.85–2.95)        | 12 (4.4)                 | 21 (3.2)                | 1.79 (0.78–4.13)        |
| <b>All-cause mortality†</b>   |                       |                         |                         |                          |                         |                         |
| <b>Any dose</b>               | <b>860 (24.3)</b>     | <b>823 (28.1)</b>       | <b>1.05 (0.89–1.23)</b> | <b>793 (22.4)</b>        | <b>806 (27.5)</b>       | <b>1.11 (0.94–1.31)</b> |
| Appropriate dose              | 513 (14.5)            | 550 (18.8)              | 0.93 (0.78–1.12)        | 532 (15.0)               | 544 (18.6)              | 1.10 (0.92–1.32)        |
| Inappropriate dose            | 346 (9.8)             | 273 (9.3)               | 1.26 (1.02–1.57)        | 254 (7.2)                | 254 (8.7)               | 1.13 (0.90–1.42)        |
| <b>Standard dose</b>          | <b>262 (7.4)</b>      | <b>356 (12.2)</b>       | <b>0.75 (0.61–0.93)</b> | <b>293 (8.3)</b>         | <b>379 (12.9)</b>       | <b>0.98 (0.79–1.20)</b> |
| Appropriate dose              | 198 (5.6)             | 313 (10.7)              | 0.69 (0.54–0.87)        | 137 (3.9)                | 222 (7.6)               | 0.81 (0.62–1.06)        |
| Inappropriate dose            | 64 (1.8)              | 43 (1.5)                | 1.14 (0.73–1.77)        | 156 (4.4)                | 157 (5.4)               | 1.20 (0.91–1.57)        |
| <b>Reduced dose</b>           | <b>597 (16.9)</b>     | <b>467 (15.9)</b>       | <b>1.28 (1.07–1.54)</b> | <b>493 (13.9)</b>        | <b>419 (14.3)</b>       | <b>1.24 (1.03–1.50)</b> |
| Appropriate dose              | 315 (8.9)             | 237 (8.1)               | 1.25 (1.00–1.57)        | 395 (11.2)               | 322 (11.0)              | 1.30 (1.06–1.60)        |
| Inappropriate dose            | 282 (8.0)             | 230 (7.9)               | 1.32 (1.05–1.66)        | 98 (2.8)                 | 97 (3.3)                | 1.05 (0.75–1.48)        |

\*ORs were adjusted for matching factors (naive at start date, sex, and year of birth), frailty, health services utilization (hospitalizations, referrals), BMI, alcohol abuse, poly medication, history of ischemic stroke, myocardial infarction, peripheral artery disease, tachycardia, hyperlipidemia, gastrointestinal diseases, osteoarthritis, asthma, obesity, and use of gastroprotective drugs, antiplatelets, other anticoagulants, oral antidiabetics, anti-infectives, and antipsychotics.

†ORs were adjusted for matching factors (naive at start date, sex, and year of birth), frailty, hospitalizations in the year before the index date, BMI, history of haemorrhagic stroke, osteoarthritis, asthma, Parkinson's disease, dementia/psychosis, and use of gastroprotective drugs, antidepressants, injectable steroids, and digoxin.

‡ORs were adjusted for matching factors (naive at start date, sex, and year of birth), poly medication, frailty, health services utilization, alcohol, BMI, history of heart failure, cancer, diabetes, peripheral artery disease, stroke, myocardial infarction, and use of oral steroids, statins, antihypertensives, parenteral anticoagulants, other DOAC, digoxin, and cytochrome P450-inducing drugs

BMI, body mass index; CI, confidence interval; CKD, chronic kidney disease; DOAC, direct oral anticoagulant; OR, odds ratio  
Note: CKD was determined based on estimated glomerular filtration rate values.

**Supplementary Table 6.** ORs (95% CI) for the risk of study outcomes, associated with apixaban vs. warfarin and with rivaroxaban vs. warfarin, according to dose classification, in the diabetes subgroup.

|                                           | Apixaban vs. warfarin |                         |                         | Rivaroxaban vs. warfarin |                         |                         |
|-------------------------------------------|-----------------------|-------------------------|-------------------------|--------------------------|-------------------------|-------------------------|
|                                           | Exposed cases, n (%)  | Exposed controls, n (%) | OR (95% CI)             | Exposed cases, n (%)     | Exposed controls, n (%) | OR (95% CI)             |
| <b>Ischemic stroke/systemic embolism*</b> |                       |                         |                         |                          |                         |                         |
| <b>Any dose</b>                           | <b>52 (26.1)</b>      | <b>147 (25.9)</b>       | <b>1.27 (0.78–2.07)</b> | <b>39 (19.6)</b>         | <b>144 (25.4)</b>       | <b>1.12 (0.67–1.88)</b> |
| Appropriate dose                          | 40 (20.1)             | 99 (17.4)               | 1.37 (0.81–2.33)        | 32 (16.1)                | 127 (22.4)              | 1.09 (0.63–1.88)        |
| Inappropriate dose                        | 12 (6.0)              | 48 (8.5)                | 1.02 (0.47–2.19)        | 7 (3.5)                  | 17 (3.0)                | 1.27 (0.47–3.46)        |
| <b>Standard dose</b>                      | <b>37 (18.6)</b>      | <b>80 (14.1)</b>        | <b>1.63 (0.94–2.85)</b> | <b>29 (14.6)</b>         | <b>104 (18.3)</b>       | <b>1.14 (0.64–2.01)</b> |
| Appropriate dose                          | 33 (16.6)             | 77 (13.6)               | 1.52 (0.86–2.68)        | 26 (13.1)                | 95 (16.7)               | 1.23 (0.68–2.23)        |
| Inappropriate dose                        | 4 (2.0)               | 3 (0.5)                 | 5.91 (1.03–33.88)       | 3 (1.5)                  | 9 (1.6)                 | 0.76 (0.18–3.15)        |
| <b>Reduced dose</b>                       | <b>15 (7.5)</b>       | <b>67 (11.8)</b>        | <b>0.82 (0.41–1.66)</b> | <b>10 (5.0)</b>          | <b>40 (7.0)</b>         | <b>1.06 (0.46–2.41)</b> |
| Appropriate dose                          | 7 (3.5)               | 22 (3.9)                | 1.04 (0.39–2.83)        | 6 (3.0)                  | 32 (5.6)                | 0.79 (0.29–2.14)        |
| Inappropriate dose                        | 8 (4.0)               | 45 (7.9)                | 0.72 (0.30–1.72)        | 4 (2.0)                  | 8 (1.4)                 | 2.13 (0.56–8.13)        |
| <b>Intracranial bleeding†</b>             |                       |                         |                         |                          |                         |                         |
| <b>Any dose</b>                           | <b>20 (31.7)</b>      | <b>54 (23.1)</b>        | <b>1.03 (0.45–2.39)</b> | <b>8 (12.7)</b>          | <b>49 (20.9)</b>        | <b>0.46 (0.18–1.21)</b> |
| Appropriate dose                          | 16 (25.4)             | 40 (17.9)               | 1.34 (0.55–3.26)        | 8 (12.7)                 | 39 (17.4)               | 0.55 (0.21–1.46)        |
| Inappropriate dose                        | 4 (6.3)               | 14 (6.3)                | 0.43 (0.10–1.84)        | 0 (0)                    | 0 (0)                   | –                       |
| <b>Standard dose</b>                      | <b>9 (14.3)</b>       | <b>37 (15.8)</b>        | <b>0.75 (0.27–2.09)</b> | <b>4 (6.3)</b>           | <b>29 (12.4)</b>        | <b>0.42 (0.12–1.46)</b> |
| Appropriate dose                          | 9 (14.3)              | 34 (15.4)               | 0.92 (0.33–2.57)        | 4 (6.3)                  | 25 (11.3)               | 0.44 (0.12–1.58)        |
| Inappropriate dose                        | 0 (0)                 | 0 (0)                   | –                       | 0 (0)                    | 0 (0)                   | –                       |
| <b>Reduced dose</b>                       | <b>11 (17.5)</b>      | <b>17 (7.3)</b>         | <b>1.59 (0.52–4.89)</b> | <b>4 (6.3)</b>           | <b>20 (8.5)</b>         | <b>0.57 (0.16–1.99)</b> |
| Appropriate dose                          | 7 (11.1)              | 6 (2.7)                 | 3.30 (0.75–14.47)       | 4 (6.3)                  | 14 (6.3)                | 0.78 (0.21–2.88)        |
| Inappropriate dose                        | 4 (6.3)               | 11 (5.0)                | 0.71 (0.16–3.16)        | 0 (0)                    | 0 (0)                   | –                       |
| <b>Haemorrhagic stroke†</b>               |                       |                         |                         |                          |                         |                         |
| <b>Any dose</b>                           | <b>13 (39.4)</b>      | <b>32 (22.7)</b>        | <b>1.02 (0.32–3.30)</b> | <b>3 (9.1)</b>           | <b>28 (19.9)</b>        | <b>0.31 (0.07–1.40)</b> |
| Appropriate dose                          | 10 (30.3)             | 26 (19.1)               | 1.37 (0.40–4.71)        | 3 (9.1)                  | 23 (16.9)               | 0.37 (0.08–1.69)        |
| Inappropriate dose                        | 3 (9.1)               | 6 (4.4)                 | 0.39 (0.05–2.86)        | 0 (0)                    | 0 (0)                   | –                       |
| <b>Standard dose</b>                      | <b>7 (21.2)</b>       | <b>25 (20.3)</b>        | <b>0.74 (0.18–3.01)</b> | <b>0 (0)</b>             | <b>0 (0)</b>            | <b>–</b>                |
| Appropriate dose                          | 7 (21.2)              | 23 (19.8)               | 1.16 (0.28–4.81)        | 0 (0)                    | 0 (0)                   | –                       |
| Inappropriate dose                        | 0 (0)                 | 0 (0)                   | –                       | 0 (0)                    | 0 (0)                   | –                       |
| <b>Reduced dose</b>                       | <b>6 (18.2)</b>       | <b>7 (5.7)</b>          | <b>1.53 (0.30–7.70)</b> | <b>3 (9.1)</b>           | <b>10 (8.1)</b>         | <b>0.80 (0.15–4.10)</b> |
| Appropriate dose                          | 3 (9.1)               | 3 (2.6)                 | 1.77 (0.21–14.97)       | 3 (9.1)                  | 4 (4.3)                 | 1.31 (0.20–8.55)        |

|                               | Apixaban vs. warfarin |                         |                         | Rivaroxaban vs. warfarin |                         |                         |
|-------------------------------|-----------------------|-------------------------|-------------------------|--------------------------|-------------------------|-------------------------|
|                               | Exposed cases, n (%)  | Exposed controls, n (%) | OR (95% CI)             | Exposed cases, n (%)     | Exposed controls, n (%) | OR (95% CI)             |
| Inappropriate dose            | 3 (9.1)               | 4 (3.4)                 | 1.10 (0.14–8.82)        | 0 (0)                    | 0 (0)                   | –                       |
| <b>Myocardial infarction*</b> |                       |                         |                         |                          |                         |                         |
| <b>Any dose</b>               | <b>62 (29.7)</b>      | <b>97 (26.1)</b>        | <b>1.54 (0.90–2.61)</b> | <b>59 (28.2)</b>         | <b>111 (29.9)</b>       | <b>1.52 (0.90–2.57)</b> |
| Appropriate dose              | 44 (21.2)             | 73 (19.7)               | 1.49 (0.84–2.65)        | 44 (21.2)                | 93 (25.1)               | 1.38 (0.79–2.42)        |
| Inappropriate dose            | 18 (8.7)              | 23 (6.2)                | 1.69 (0.75–3.84)        | 14 (6.7)                 | 18 (4.9)                | 2.11 (0.89–5.03)        |
| <b>Standard dose</b>          | <b>39 (18.8)</b>      | <b>63 (17.0)</b>        | <b>1.63 (0.91–2.94)</b> | <b>34 (16.3)</b>         | <b>85 (23.0)</b>        | <b>1.25 (0.70–2.25)</b> |
| Appropriate dose              | 36 (17.3)             | 62 (16.8)               | 1.53 (0.84–2.79)        | 26 (12.5)                | 72 (19.5)               | 1.13 (0.60–2.13)        |
| Inappropriate dose            | 3 (1.4)               | 1 (0.3)                 | 5.69 (0.52–62.14)       | 8 (3.8)                  | 13 (3.5)                | 1.84 (0.64–5.32)        |
| <b>Reduced dose</b>           | <b>23 (11.1)</b>      | <b>33 (8.9)</b>         | <b>1.41 (0.66–3.00)</b> | <b>24 (11.5)</b>         | <b>26 (7.0)</b>         | <b>2.23 (1.05–4.73)</b> |
| Appropriate dose              | 8 (3.8)               | 11 (3.0)                | 1.29 (0.40–4.19)        | 18 (8.7)                 | 21 (5.7)                | 2.14 (0.93–4.94)        |
| Inappropriate dose            | 15 (7.2)              | 22 (5.9)                | 1.49 (0.63–3.55)        | 6 (2.9)                  | 5 (1.4)                 | 2.73 (0.69–10.77)       |
| <b>All-cause mortality†</b>   |                       |                         |                         |                          |                         |                         |
| <b>Any dose</b>               | <b>514 (24.4)</b>     | <b>457 (29.3)</b>       | <b>0.97 (0.78–1.20)</b> | <b>476 (22.6)</b>        | <b>430 (27.5)</b>       | <b>1.11 (0.89–1.38)</b> |
| Appropriate dose              | 334 (15.9)            | 325 (20.8)              | 0.90 (0.71–1.14)        | 353 (16.8)               | 353 (22.6)              | 1.01 (0.80–1.28)        |
| Inappropriate dose            | 178 (8.5)             | 132 (8.5)               | 1.15 (0.85–1.56)        | 120 (5.7)                | 77 (4.9)                | 1.49 (1.04–2.14)        |
| <b>Standard dose</b>          | <b>249 (11.9)</b>     | <b>257 (15.3)</b>       | <b>0.87 (0.67–1.12)</b> | <b>268 (12.8)</b>        | <b>284 (18.2)</b>       | <b>1.00 (0.78–1.28)</b> |
| Appropriate dose              | 206 (9.8)             | 239 (15.3)              | 0.79 (0.61–1.03)        | 216 (10.3)               | 251 (16.1)              | 0.94 (0.72–1.22)        |
| Inappropriate dose            | 43 (2.0)              | 18 (1.2)                | 1.78 (0.94–3.38)        | 52 (2.5)                 | 33 (2.1)                | 1.33 (0.80–2.21)        |
| <b>Reduced dose</b>           | <b>263 (12.5)</b>     | <b>200 (12.8)</b>       | <b>1.11 (0.85–1.46)</b> | <b>205 (9.8)</b>         | <b>146 (9.4)</b>        | <b>1.31 (0.98–1.76)</b> |
| Appropriate dose              | 128 (6.1)             | 86 (5.5)                | 1.18 (0.83–1.68)        | 137 (6.5)                | 102 (6.5)               | 1.18 (0.84–1.65)        |
| Inappropriate dose            | 135 (6.4)             | 114 (7.3)               | 1.06 (0.77–1.48)        | 68 (3.2)                 | 44 (2.8)                | 1.66 (1.05–2.63)        |

\*ORs were adjusted for matching factors (naive at start date, sex, and year of birth), frailty, health services utilization (hospitalizations, referrals), BMI, alcohol abuse, poly medication, history of ischemic stroke, myocardial infarction, peripheral artery disease, tachycardia, hyperlipidaemia, gastrointestinal diseases, osteoarthritis, asthma, obesity, and use of gastroprotective drugs, antiplatelets, other anticoagulants, oral antidiabetics, anti-infectives, and antipsychotics.

†ORs were adjusted for matching factors (naive at start date, sex, and year of birth), frailty, hospitalizations in the year before the index date, BMI, history of haemorrhagic stroke, osteoarthritis, asthma, Parkinson's disease, dementia/psychosis, and use of gastroprotective drugs, antidepressants, injectable steroids, and digoxin.

‡ORs were adjusted for matching factors (naive at start date, sex, and year of birth), poly medication, frailty, health services utilization, alcohol, BMI, history of heart failure, cancer, peripheral artery disease, stroke, myocardial infarction, and use of oral steroids, statins, antihypertensives, parenteral anticoagulants, other DOAC, digoxin, and CYP-inducing drugs.

BMI, body mass index; CI, confidence interval; CYP, cytochrome P450; DOAC, direct oral anticoagulant; OR, odds ratio Note: Diabetes was determined based on coded entries.

**Supplementary Table 7.** ORs (95% CI) for the risk of study outcomes, associated with apixaban vs. warfarin and with rivaroxaban vs. warfarin, according to dose classification, among individuals with CHA<sub>2</sub>DS<sub>2</sub>-VASc score >4.

|                                           | Apixaban vs. warfarin |                         |                         | Rivaroxaban vs. warfarin |                         |                         |
|-------------------------------------------|-----------------------|-------------------------|-------------------------|--------------------------|-------------------------|-------------------------|
|                                           | Exposed cases, n (%)  | Exposed controls, n (%) | OR (95% CI)             | Exposed cases, n (%)     | Exposed controls, n (%) | OR (95% CI)             |
| <b>Ischemic stroke/systemic embolism*</b> |                       |                         |                         |                          |                         |                         |
| <b>Any dose</b>                           | <b>72 (24.5)</b>      | <b>199 (29.2)</b>       | <b>0.98 (0.64–1.50)</b> | <b>68 (23.1)</b>         | <b>185 (27.2)</b>       | <b>0.99 (0.65–1.52)</b> |
| Appropriate dose                          | 54 (18.4)             | 134 (19.7)              | 1.06 (0.67–1.67)        | 54 (18.4)                | 143 (21)                | 1.01 (0.64–1.60)        |
| Inappropriate dose                        | 18 (6.1)              | 65 (9.5)                | 0.81 (0.42–1.54)        | 13 (4.4)                 | 42 (6.2)                | 0.84 (0.40–1.78)        |
| <b>Standard dose</b>                      | <b>45 (15.4)</b>      | <b>83 (12.2)</b>        | <b>1.34 (0.81–2.21)</b> | <b>40 (13.7)</b>         | <b>107 (15.7)</b>       | <b>0.86 (0.52–1.41)</b> |
| Appropriate dose                          | 40 (13.7)             | 79 (11.6)               | 1.25 (0.75–2.08)        | 37 (12.6)                | 92 (13.5)               | 0.95 (0.57–1.59)        |
| Inappropriate dose                        | 5 (1.7)               | 4 (0.6)                 | 4.27 (0.90–20.28)       | 3 (1)                    | 15 (2.2)                | 0.45 (0.12–1.69)        |
| <b>Reduced dose</b>                       | <b>27 (9.2)</b>       | <b>116 (17)</b>         | <b>0.69 (0.40–1.20)</b> | <b>27 (9.2)</b>          | <b>78 (11.5)</b>        | <b>1.19 (0.67–2.10)</b> |
| Appropriate dose                          | 14 (4.8)              | 55 (8.1)                | 0.79 (0.39–1.61)        | 17 (5.8)                 | 51 (7.5)                | 1.24 (0.63–2.42)        |
| Inappropriate dose                        | 13 (4.4)              | 61 (9)                  | 0.63 (0.31–1.28)        | 10 (3.4)                 | 27 (4)                  | 1.16 (0.49–2.77)        |
| <b>Intracranial bleeding†</b>             |                       |                         |                         |                          |                         |                         |
| <b>Any dose</b>                           | <b>21 (25.3)</b>      | <b>92 (29.5)</b>        | <b>0.58 (0.28–1.20)</b> | <b>11 (13.3)</b>         | <b>71 (22.8)</b>        | <b>0.45 (0.20–1.04)</b> |
| Appropriate dose                          | 16 (19.3)             | 64 (20.5)               | 0.66 (0.30–1.45)        | 8 (9.6)                  | 58 (18.6)               | 0.38 (0.15–0.96)        |
| Inappropriate dose                        | 5 (6)                 | 28 (9)                  | 0.43 (0.13–1.40)        | 3 (3.6)                  | 13 (4.2)                | 0.83 (0.18–3.72)        |
| <b>Standard dose</b>                      | <b>8 (9.6)</b>        | <b>47 (15.1)</b>        | <b>0.36 (0.13–0.96)</b> | <b>6 (7.2)</b>           | <b>41 (13.1)</b>        | <b>0.41 (0.14–1.15)</b> |
| Appropriate dose                          | 8 (9.6)               | 43 (14)                 | 0.43 (0.16–1.16)        | 4 (4.8)                  | 38 (12.3)               | 0.27 (0.08–0.88)        |
| Inappropriate dose                        | 0 (0)                 | 0 (0)                   | –                       | 2 (2.4)                  | 3 (1)                   | 5.40 (0.67–43.83)       |
| <b>Reduced dose</b>                       | <b>13 (15.7)</b>      | <b>45 (14.4)</b>        | <b>0.90 (0.37–2.17)</b> | <b>5 (6)</b>             | <b>30 (9.6)</b>         | <b>0.56 (0.18–1.75)</b> |
| Appropriate dose                          | 8 (9.6)               | 21 (6.8)                | 1.20 (0.40–3.62)        | 4 (4.8)                  | 20 (6.5)                | 0.80 (0.23–2.81)        |
| Inappropriate dose                        | 5 (6)                 | 24 (7.8)                | 0.62 (0.18–2.08)        | 1 (1.2)                  | 10 (3.2)                | 0.20 (0.02–2.20)        |
| <b>Haemorrhagic stroke†</b>               |                       |                         |                         |                          |                         |                         |
| <b>Any dose</b>                           | <b>11 (23.9)</b>      | <b>46 (26)</b>          | <b>0.46 (0.17–1.31)</b> | <b>6 (13)</b>            | <b>37 (20.9)</b>        | <b>0.45 (0.14–1.47)</b> |
| Appropriate dose                          | 7 (15.2)              | 33 (18.6)               | 0.44 (0.14–1.45)        | 5 (10.9)                 | 29 (16.4)               | 0.48 (0.14–1.65)        |
| Inappropriate dose                        | 4 (8.7)               | 13 (7.3)                | 0.51 (0.11–2.28)        | 1 (2.2)                  | 8 (4.5)                 | 0.33 (0.03–4.18)        |
| <b>Standard dose</b>                      | <b>4 (8.7)</b>        | <b>23 (13)</b>          | <b>0.34 (0.08–1.47)</b> | <b>2 (4.3)</b>           | <b>21 (11.9)</b>        | <b>0.25 (0.05–1.35)</b> |
| Appropriate dose                          | 4 (8.7)               | 21 (12.5)               | 0.45 (0.10–2.06)        | 1 (2.2)                  | 20 (11.9)               | 0.12 (0.01–1.09)        |
| Inappropriate dose                        | 0 (0)                 | 0 (0)                   | –                       | 1 (2.2)                  | 1 (0.6)                 | 12.72 (0.35–463.14)     |
| <b>Reduced dose</b>                       | <b>7 (15.2)</b>       | <b>23 (13)</b>          | <b>0.61 (0.17–2.14)</b> | <b>4 (8.7)</b>           | <b>16 (9)</b>           | <b>0.85 (0.20–3.69)</b> |
| Appropriate dose                          | 3 (6.5)               | 12 (7.1)                | 0.41 (0.07–2.28)        | 4 (8.7)                  | 9 (5.4)                 | 2.18 (0.43–11.16)       |



|                               | Apixaban vs. warfarin |                         |                         | Rivaroxaban vs. warfarin |                         |                         |
|-------------------------------|-----------------------|-------------------------|-------------------------|--------------------------|-------------------------|-------------------------|
|                               | Exposed cases, n (%)  | Exposed controls, n (%) | OR (95% CI)             | Exposed cases, n (%)     | Exposed controls, n (%) | OR (95% CI)             |
| Inappropriate dose            | 4 (8.7)               | 11 (6.5)                | 0.85 (0.17–4.19)        | 0 (0)                    | 0 (0)                   | –                       |
| <b>Myocardial infarction*</b> |                       |                         |                         |                          |                         |                         |
| <b>Any dose</b>               | <b>82 (34.9)</b>      | <b>127 (28.7)</b>       | <b>1.84 (1.11–3.04)</b> | <b>58 (24.7)</b>         | <b>134 (30.3)</b>       | <b>1.22 (0.72–2.07)</b> |
| Appropriate dose              | 56 (23.8)             | 85 (19.3)               | 1.91 (1.11–3.30)        | 45 (19.1)                | 107 (24.3)              | 1.20 (0.68–2.10)        |
| Inappropriate dose            | 26 (11.1)             | 41 (9.3)                | 1.73 (0.86–3.50)        | 13 (5.5)                 | 27 (6.1)                | 1.30 (0.56–3.01)        |
| <b>Standard dose</b>          | <b>42 (17.9)</b>      | <b>55 (12.5)</b>        | <b>1.97 (1.10–3.54)</b> | <b>27 (11.5)</b>         | <b>89 (20.2)</b>        | <b>0.84 (0.45–1.55)</b> |
| Appropriate dose              | 37 (15.7)             | 53 (12)                 | 1.77 (0.97–3.25)        | 19 (8.1)                 | 73 (16.6)               | 0.74 (0.38–1.46)        |
| Inappropriate dose            | 5 (2.1)               | 2 (0.5)                 | 6.79 (1.14–40.42)       | 8 (3.4)                  | 16 (3.6)                | 1.22 (0.43–3.44)        |
| <b>Reduced dose</b>           | <b>40 (17)</b>        | <b>71 (16.1)</b>        | <b>1.84 (0.99–3.42)</b> | <b>31 (13.2)</b>         | <b>45 (10.2)</b>        | <b>2.15 (1.09–4.24)</b> |
| Appropriate dose              | 19 (8.1)              | 32 (7.3)                | 2.33 (1.06–5.14)        | 26 (11.1)                | 34 (7.7)                | 2.38 (1.14–4.97)        |
| Inappropriate dose            | 21 (8.9)              | 39 (8.8)                | 1.49 (0.70–3.17)        | 5 (2.1)                  | 11 (2.5)                | 1.55 (0.45–5.33)        |
| <b>All-cause mortality†</b>   |                       |                         |                         |                          |                         |                         |
| <b>Any dose</b>               | <b>720 (25.6)</b>     | <b>663 (30.4)</b>       | <b>1.08 (0.90–1.30)</b> | <b>692 (24.6)</b>        | <b>662 (30.4)</b>       | <b>1.18 (0.98–1.42)</b> |
| Appropriate dose              | 444 (15.8)            | 450 (20.7)              | 0.99 (0.81–1.21)        | 471 (16.8)               | 487 (22.4)              | 1.08 (0.88–1.32)        |
| Inappropriate dose            | 273 (9.7)             | 213 (9.8)               | 1.27 (1.00–1.62)        | 211 (7.5)                | 171 (7.9)               | 1.44 (1.10–1.87)        |
| <b>Standard dose</b>          | <b>236 (8.4)</b>      | <b>293 (13.5)</b>       | <b>0.83 (0.65–1.05)</b> | <b>322 (11.5)</b>        | <b>388 (17.8)</b>       | <b>1.01 (0.81–1.25)</b> |
| Appropriate dose              | 198 (7)               | 265 (12.2)              | 0.80 (0.63–1.03)        | 254 (9)                  | 315 (14.5)              | 1.00 (0.79–1.26)        |
| Inappropriate dose            | 38 (1.4)              | 28 (1.3)                | 1.05 (0.60–1.82)        | 68 (2.4)                 | 73 (3.4)                | 1.06 (0.72–1.56)        |
| <b>Reduced dose</b>           | <b>481 (17.1)</b>     | <b>370 (17)</b>         | <b>1.29 (1.05–1.59)</b> | <b>360 (12.8)</b>        | <b>270 (12.4)</b>       | <b>1.41 (1.12–1.76)</b> |
| Appropriate dose              | 246 (8.8)             | 185 (8.5)               | 1.27 (0.98–1.65)        | 217 (7.7)                | 172 (7.9)               | 1.23 (0.95–1.60)        |
| Inappropriate dose            | 235 (8.4)             | 185 (8.5)               | 1.32 (1.03–1.71)        | 143 (5.1)                | 98 (4.5)                | 1.76 (1.28–2.42)        |

\*ORs were adjusted for matching factors (naive at start date, sex, and year of birth), frailty, health services utilization (hospitalizations, referrals), BMI, alcohol abuse, poly medication, history of ischemic stroke, myocardial infarction, peripheral artery disease, tachycardia, hyperlipidaemia, gastrointestinal diseases, osteoarthritis, asthma, obesity, and use of gastroprotective drugs, antiplatelets, other anticoagulants, oral antidiabetics, anti-infectives, and antipsychotics.

†ORs were adjusted for matching factors (naive at start date, sex, and year of birth), frailty, hospitalizations in the year before the index date, BMI, history of haemorrhagic stroke, osteoarthritis, asthma, Parkinson's disease, dementia/psychosis, and use of gastroprotective drugs, antidepressants, injectable steroids, and digoxin. ‡ORs were adjusted for matching factors (naive at start date, sex, and year of birth), poly medication, frailty, health services utilization, alcohol, BMI, history of heart failure, cancer, peripheral artery disease, stroke, myocardial infarction, and use of oral steroids, statins, antihypertensives, parenteral anticoagulants, other DOAC, digoxin, and CYP-inducing drugs  
BMI, body mass index; CI, confidence interval; CYP, cytochrome P450; DOAC, direct oral anticoagulant; OR, odds ratio

**Supplementary Table 8.** ORs (95% CI) for the risk of study outcomes, associated with apixaban vs. warfarin and with rivaroxaban vs. warfarin, according to dose classification, among individuals with HAS-BLED score >2.

|                                           | Apixaban vs. warfarin |                         |                         | Rivaroxaban vs. warfarin |                         |                         |
|-------------------------------------------|-----------------------|-------------------------|-------------------------|--------------------------|-------------------------|-------------------------|
|                                           | Exposed cases, n (%)  | Exposed controls, n (%) | OR (95% CI)             | Exposed cases, n (%)     | Exposed controls, n (%) | OR (95% CI)             |
| <b>Ischemic stroke/systemic embolism*</b> |                       |                         |                         |                          |                         |                         |
| <b>Any dose</b>                           | <b>60 (24.5)</b>      | <b>117 (22.9)</b>       | <b>1.33 (0.84–2.10)</b> | <b>54 (22)</b>           | <b>125 (24.4)</b>       | <b>1.10 (0.70–1.73)</b> |
| Appropriate dose                          | 47 (19.2)             | 87 (17)                 | 1.44 (0.88–2.34)        | 44 (18)                  | 97 (18.9)               | 1.15 (0.71–1.87)        |
| Inappropriate dose                        | 13 (5.3)              | 30 (5.9)                | 0.99 (0.45–2.17)        | 10 (4.1)                 | 28 (5.5)                | 0.89 (0.38–2.06)        |
| <b>Standard dose</b>                      | <b>36 (14.7)</b>      | <b>68 (13.3)</b>        | <b>1.50 (0.88–2.56)</b> | <b>37 (15.1)</b>         | <b>78 (15.2)</b>        | <b>1.10 (0.66–1.84)</b> |
| Appropriate dose                          | 33 (13.5)             | 65 (12.7)               | 1.45 (0.84–2.50)        | 34 (13.9)                | 69 (13.5)               | 1.14 (0.67–1.95)        |
| Inappropriate dose                        | 3 (1.2)               | 3 (0.6)                 | 2.50 (0.39–15.92)       | 3 (1.2)                  | 9 (1.8)                 | 0.84 (0.20–3.41)        |
| <b>Reduced dose</b>                       | <b>24 (9.8)</b>       | <b>49 (9.6)</b>         | <b>1.10 (0.58–2.07)</b> | <b>17 (6.9)</b>          | <b>47 (9.2)</b>         | <b>1.06 (0.53–2.11)</b> |
| Appropriate dose                          | 14 (5.7)              | 22 (4.3)                | 1.40 (0.63–3.12)        | 10 (4.1)                 | 28 (5.5)                | 1.19 (0.52–2.76)        |
| Inappropriate dose                        | 10 (4.1)              | 27 (5.3)                | 0.84 (0.36–1.98)        | 7 (2.9)                  | 19 (3.7)                | 0.91 (0.34–2.48)        |
| <b>Intracranial bleeding†</b>             |                       |                         |                         |                          |                         |                         |
| <b>Any dose</b>                           | <b>21 (25)</b>        | <b>68 (27.9)</b>        | <b>0.36 (0.16–0.81)</b> | <b>13 (15.5)</b>         | <b>51 (20.9)</b>        | <b>0.42 (0.18–0.97)</b> |
| Appropriate dose                          | 18 (21.4)             | 52 (21.3)               | 0.38 (0.16–0.90)        | 8 (9.5)                  | 44 (18)                 | 0.30 (0.11–0.79)        |
| Inappropriate dose                        | 3 (3.6)               | 16 (6.6)                | 0.26 (0.06–1.17)        | 5 (6)                    | 7 (2.9)                 | 1.17 (0.29–4.68)        |
| <b>Standard dose</b>                      | <b>10 (11.9)</b>      | <b>37 (15.2)</b>        | <b>0.27 (0.10–0.73)</b> | <b>7 (8.3)</b>           | <b>29 (11.9)</b>        | <b>0.36 (0.13–1.04)</b> |
| Appropriate dose                          | 10 (11.9)             | 33 (13.8)               | 0.33 (0.12–0.89)        | 5 (6)                    | 24 (10)                 | 0.29 (0.09–0.94)        |
| Inappropriate dose                        | 0(0)                  | 0 (0)                   | –                       | 2 (2.4)                  | 5 (2.1)                 | 0.81 (0.13–4.91)        |
| <b>Reduced dose</b>                       | <b>11 (13.1)</b>      | <b>31 (12.7)</b>        | <b>0.55 (0.19–1.60)</b> | <b>6 (7.1)</b>           | <b>22 (9)</b>           | <b>0.53 (0.17–1.66)</b> |
| Appropriate dose                          | 8 (9.5)               | 19 (7.9)                | 0.54 (0.16–1.88)        | 3 (3.6)                  | 20 (8.3)                | 0.34 (0.08–1.39)        |
| Inappropriate dose                        | 3 (3.6)               | 12 (5)                  | 0.50 (0.10–2.46)        | 3 (3.6)                  | 2 (0.8)                 | 2.13 (0.23–19.67)       |
| <b>Haemorrhagic stroke†</b>               |                       |                         |                         |                          |                         |                         |
| <b>Any dose</b>                           | <b>12 (23.5)</b>      | <b>31 (23.5)</b>        | <b>0.29 (0.10–0.88)</b> | <b>9 (17.6)</b>          | <b>32 (24.2)</b>        | <b>0.30 (0.10–0.97)</b> |
| Appropriate dose                          | 10 (19.6)             | 26 (19.7)               | 0.28 (0.09–0.92)        | 4 (7.8)                  | 29 (22)                 | 0.11 (0.02–0.50)        |
| Inappropriate dose                        | 2 (3.9)               | 5 (3.8)                 | 0.18 (0.02–1.60)        | 5 (9.8)                  | 3 (2.3)                 | 2.53 (0.40–15.79)       |
| <b>Standard dose</b>                      | <b>7 (13.7)</b>       | <b>19 (14.4)</b>        | <b>0.30 (0.09–1.08)</b> | <b>4 (7.8)</b>           | <b>19 (14.4)</b>        | <b>0.18 (0.04–0.84)</b> |
| Appropriate dose                          | 7 (13.7)              | 17 (13.1)               | 0.34 (0.09–1.29)        | 2 (3.9)                  | 18 (13.8)               | 0.07 (0.01–0.52)        |
| Inappropriate dose                        | 0 (0)                 | 0 (0)                   | –                       | 2 (3.9)                  | 1 (0.8)                 | 4.27 (0.21–88.11)       |
| <b>Reduced dose</b>                       | <b>5 (9.8)</b>        | <b>12 (9.1)</b>         | <b>0.28 (0.06–1.41)</b> | <b>5 (9.8)</b>           | <b>13 (9.8)</b>         | <b>0.51 (0.12–2.14)</b> |
| Appropriate dose                          | 3 (5.9)               | 9 (6.9)                 | 0.18 (0.03–1.24)        | 2 (3.9)                  | 11 (8.5)                | 0.22 (0.03–1.56)        |

|                               | Apixaban vs. warfarin |                         |                         | Rivaroxaban vs. warfarin |                         |                         |
|-------------------------------|-----------------------|-------------------------|-------------------------|--------------------------|-------------------------|-------------------------|
|                               | Exposed cases, n (%)  | Exposed controls, n (%) | OR (95% CI)             | Exposed cases, n (%)     | Exposed controls, n (%) | OR (95% CI)             |
| Inappropriate dose            | 2 (3.9)               | 3 (2.3)                 | 0.42 (0.03–5.07)        | 3 (5.9)                  | 2 (1.5)                 | 1.67 (0.16–17.05)       |
| <b>Myocardial infarction*</b> |                       |                         |                         |                          |                         |                         |
| <b>Any dose</b>               | <b>59 (33.3)</b>      | <b>92 (22.8)</b>        | <b>1.60 (0.92–2.77)</b> | <b>40 (22.6)</b>         | <b>106 (26.2)</b>       | <b>1.03 (0.59–1.81)</b> |
| Appropriate dose              | 41 (23.2)             | 69 (17.1)               | 1.64 (0.90–2.97)        | 34 (19.2)                | 85 (21.1)               | 1.15 (0.64–2.08)        |
| Inappropriate dose            | 18 (10.2)             | 22 (5.5)                | 1.54 (0.67–3.55)        | 6 (3.4)                  | 21 (5.2)                | 0.65 (0.23–1.85)        |
| <b>Standard dose</b>          | <b>29 (16.4)</b>      | <b>51 (12.7)</b>        | <b>1.60 (0.84–3.03)</b> | <b>23 (13)</b>           | <b>71 (17.6)</b>        | <b>0.95 (0.50–1.82)</b> |
| Appropriate dose              | 26 (14.7)             | 50 (12.4)               | 1.46 (0.75–2.83)        | 19 (10.7)                | 61 (15.1)               | 0.98 (0.49–1.94)        |
| Inappropriate dose            | 3 (1.7)               | 1 (0.2)                 | 4.99 (0.47–53.01)       | 4 (2.3)                  | 10 (2.5)                | 0.87 (0.24–3.21)        |
| <b>Reduced dose</b>           | <b>30 (16.9)</b>      | <b>40 (9.9)</b>         | <b>1.67 (0.82–3.41)</b> | <b>17(9.6)</b>           | <b>35 (8.7)</b>         | <b>1.19 (0.54–2.60)</b> |
| Appropriate dose              | 15 (8.5)              | 19 (4.7)                | 2.07 (0.82–5.19)        | 15 (8.5)                 | 24 (6)                  | 1.60 (0.67–3.83)        |
| Inappropriate dose            | 15 (8.5)              | 21 (5.2)                | 1.37 (0.56–3.33)        | 2 (1.1)                  | 11 (2.7)                | 0.47 (0.09–2.39)        |
| <b>All-cause mortality†</b>   |                       |                         |                         |                          |                         |                         |
| <b>Any dose</b>               | <b>460(23.8)</b>      | <b>472 (29.6)</b>       | <b>0.98(0.80–1.21)</b>  | <b>396 (20.5)</b>        | <b>400 (25.1)</b>       | <b>1.09 (0.88–1.36)</b> |
| Appropriate dose              | 276 (14.3)            | 325 (20.4)              | 0.89 (0.70–1.13)        | 275 (14.3)               | 314 (19.7)              | 0.95 (0.75–1.20)        |
| Inappropriate dose            | 182 (9.4)             | 147 (9.2)               | 1.17 (0.87–1.56)        | 119 (6.2)                | 83(5.2)                 | 1.70 (1.19–2.42)        |
| <b>Standard dose</b>          | <b>159 (8.3)</b>      | <b>229 (14.4)</b>       | <b>0.78 (0.59–1.03)</b> | <b>188 (9.8)</b>         | <b>249 (15.6)</b>       | <b>0.87 (0.67–1.13)</b> |
| Appropriate dose              | 129 (6.7)             | 205 (12.9)              | 0.76 (0.57–1.02)        | 152 (7.9)                | 212 (13.3)              | 0.82 (0.62–1.09)        |
| Inappropriate dose            | 30 (1.6)              | 24 (1.5)                | 0.91 (0.49–1.67)        | 36 (1.9)                 | 37 (2.3)                | 1.15 (0.67–1.97)        |
| <b>Reduced dose</b>           | <b>299 (15.5)</b>     | <b>243 (15.3)</b>       | <b>1.18 (0.92–1.52)</b> | <b>206 (10.7)</b>        | <b>148 (9.3)</b>        | <b>1.49 (1.12–1.98)</b> |
| Appropriate dose              | 147 (7.6)             | 120 (7.5)               | 1.11 (0.80–1.53)        | 123 (6.4)                | 102 (6.4)               | 1.21 (0.87–1.69)        |
| Inappropriate dose            | 152 (7.9)             | 123 (7.7)               | 1.26 (0.92–1.72)        | 83 (4.3)                 | 46 (2.9)                | 2.22 (1.43–3.43)        |

\*ORs were adjusted for matching factors (naive at start date, sex, and year of birth), frailty, health services utilization (hospitalizations, referrals), BMI, alcohol abuse, polymedication, history of ischemic stroke, myocardial infarction, peripheral artery disease, tachycardia, hyperlipidaemia, gastrointestinal diseases, osteoarthritis, asthma, obesity, and use of gastroprotective drugs, antiplatelets, other anticoagulants, oral antidiabetics, anti-infectives, and antipsychotics.

†ORs were adjusted for matching factors (naive at start date, sex, and year of birth), frailty, hospitalizations in the year before the index date, BMI, history of haemorrhagic stroke, osteoarthritis, asthma, Parkinson's disease, dementia/psychosis, and use of gastroprotective drugs, antidepressants, injectable steroids, and digoxin. ‡ORs were adjusted for matching factors (naive at start date, sex, and year of birth), polymedication, frailty, health services utilization, alcohol, BMI, history of heart failure, cancer, peripheral artery disease, stroke, myocardial infarction, and use of oral steroids, statins, antihypertensives, parenteral anticoagulants, other DOAC, digoxin, and CYP-inducing drugs

BMI, body mass index; CI, confidence interval; CYP, cytochrome P450; DOAC, direct oral anticoagulant; OR, odds ratio

**Supplementary Table 9.** ORs (95% CI) for the risk of study outcomes, associated with apixaban vs. warfarin and with rivaroxaban vs. warfarin, according to dose classification, among individuals with severe frailty.

|                                           | Apixaban vs. warfarin |                         |                         | Rivaroxaban vs. warfarin |                         |                         |
|-------------------------------------------|-----------------------|-------------------------|-------------------------|--------------------------|-------------------------|-------------------------|
|                                           | Exposed cases, n (%)  | Exposed controls, n (%) | OR (95% CI)             | Exposed cases, n (%)     | Exposed controls, n (%) | OR (95% CI)             |
| <b>Ischemic stroke/systemic embolism*</b> |                       |                         |                         |                          |                         |                         |
| <b>Any dose</b>                           | <b>41 (25.2)</b>      | <b>111 (29.4)</b>       | <b>1.22 (0.66–2.25)</b> | <b>44 (27)</b>           | <b>108 (28.6)</b>       | <b>1.34 (0.72–2.50)</b> |
| Appropriate dose                          | 29 (17.8)             | 63 (16.7)               | 1.49 (0.77–2.91)        | 34 (20.9)                | 80 (21.2)               | 1.42 (0.73–2.76)        |
| Inappropriate dose                        | 12 (7.4)              | 48 (12.7)               | 0.84 (0.36–1.95)        | 10 (6.1)                 | 28 (7.4)                | 1.14 (0.45–2.88)        |
| <b>Standard dose</b>                      | <b>23 (14.1)</b>      | <b>40 (10.6)</b>        | <b>1.79 (0.86–3.69)</b> | <b>24 (14.7)</b>         | <b>61 (16.2)</b>        | <b>1.09 (0.53–2.22)</b> |
| Appropriate dose                          | 18 (11)               | 36 (9.5)                | 1.58 (0.73–3.39)        | 20 (12.3)                | 49 (13)                 | 1.18 (0.55–2.54)        |
| Inappropriate dose                        | 5 (3.1)               | 4 (1.1)                 | 3.87 (0.78–19.18)       | 4 (2.5)                  | 12 (3.2)                | 0.82 (0.22–3.06)        |
| <b>Reduced dose</b>                       | <b>18 (11)</b>        | <b>71 (18.8)</b>        | <b>0.83 (0.40–1.75)</b> | <b>20 (12.3)</b>         | <b>47 (12.5)</b>        | <b>1.67 (0.78–3.57)</b> |
| Appropriate dose                          | 11 (6.7)              | 27 (7.2)                | 1.30 (0.52–3.27)        | 14 (8.6)                 | 31 (8.2)                | 1.84 (0.79–4.30)        |
| Inappropriate dose                        | 7 (4.3)               | 44 (11.7)               | 0.54 (0.20–1.45)        | 6 (3.7)                  | 16 (4.2)                | 1.47 (0.46–4.74)        |
| <b>Intracranial bleeding†</b>             |                       |                         |                         |                          |                         |                         |
| <b>Any dose</b>                           | <b>19 (31.1)</b>      | <b>49 (29.7)</b>        | <b>1.09 (0.43–2.78)</b> | <b>10 (16.4)</b>         | <b>41 (24.8)</b>        | <b>0.53 (0.18–1.52)</b> |
| Appropriate dose                          | 14 (23)               | 26 (15.8)               | 1.48 (0.53–4.11)        | 9 (14.8)                 | 27 (16.4)               | 0.71 (0.23–2.15)        |
| Inappropriate dose                        | 5 (8.2)               | 23 (13.9)               | 0.58 (0.16–2.11)        | 1 (1.6)                  | 14 (8.5)                | 0.14 (0.01–1.46)        |
| <b>Standard dose</b>                      | <b>8 (13.1)</b>       | <b>16 (9.7)</b>         | <b>1.17 (0.36–3.83)</b> | <b>7 (11.5)</b>          | <b>19 (11.5)</b>        | <b>0.65 (0.19–2.22)</b> |
| Appropriate dose                          | 7 (11.5)              | 13 (8.4)                | 1.43 (0.41–4.96)        | 6 (9.8)                  | 16 (10.4)               | 0.65 (0.18–2.36)        |
| Inappropriate dose                        | 1 (1.6)               | 3 (1.9)                 | 0.35 (0.02–5.17)        | 1 (1.6)                  | 3 (1.9)                 | 0.64 (0.04–10.53)       |
| <b>Reduced dose</b>                       | <b>11 (18)</b>        | <b>33 (20)</b>          | <b>1.04 (0.36–3.01)</b> | <b>3 (4.9)</b>           | <b>22 (13.3)</b>        | <b>0.38 (0.08–1.67)</b> |
| Appropriate dose                          | 7 (11.5)              | 13 (8.4)                | 1.52 (0.42–5.52)        | 3 (4.9)                  | 11 (7.1)                | 0.87 (0.17–4.34)        |
| Inappropriate dose                        | 4 (6.6)               | 20 (13)                 | 0.65 (0.17–2.56)        | 0 (0)                    | 0 (0)                   | 1.00 (–)                |
| <b>Haemorrhagic stroke†</b>               |                       |                         |                         |                          |                         |                         |
| <b>Any dose</b>                           | <b>9 (23.7)</b>       | <b>18 (22.5)</b>        | <b>0.74 (0.21–2.63)</b> | <b>7 (18.4)</b>          | <b>20 (25)</b>          | <b>0.48 (0.13–1.80)</b> |
| Appropriate dose                          | 6 (15.8)              | 10 (12.5)               | 0.95 (0.22–4.03)        | 6 (15.8)                 | 14 (17.5)               | 0.57 (0.14–2.30)        |
| Inappropriate dose                        | 3 (7.9)               | 8 (10)                  | 0.47 (0.08–2.81)        | 1 (2.6)                  | 6 (7.5)                 | 0.18 (0.01–2.66)        |
| <b>Standard dose</b>                      | <b>3 (7.9)</b>        | <b>7 (8.8)</b>          | <b>0.44 (0.08–2.50)</b> | <b>4 (10.5)</b>          | <b>9 (11.3)</b>         | <b>0.61 (0.13–2.91)</b> |
| Appropriate dose                          | 3 (8.1)               | 5 (7.1)                 | 0.81 (0.13–5.16)        | 3 (8.1)                  | 9 (12.9)                | 0.46 (0.09–2.40)        |
| Inappropriate dose                        | 0 (0)                 | 0 (0)                   | –                       | 0 (0)                    | 0 (0)                   | –                       |
| <b>Reduced dose</b>                       | <b>6 (15.8)</b>       | <b>11 (13.8)</b>        | <b>1.06 (0.24–4.66)</b> | <b>3 (7.9)</b>           | <b>11 (13.8)</b>        | <b>0.35 (0.06–2.05)</b> |
| Appropriate dose                          | 3 (8.1)               | 5 (7.1)                 | 0.86 (0.11–6.73)        | 3 (8.1)                  | 4 (5.7)                 | 0.82 (0.11–6.22)        |

|                               | Apixaban vs. warfarin |                         |                         | Rivaroxaban vs. warfarin |                         |                         |
|-------------------------------|-----------------------|-------------------------|-------------------------|--------------------------|-------------------------|-------------------------|
|                               | Exposed cases, n (%)  | Exposed controls, n (%) | OR (95% CI)             | Exposed cases, n (%)     | Exposed controls, n (%) | OR (95% CI)             |
| Inappropriate dose            | 3 (8.1)               | 6 (8.6)                 | 0.90 (0.15–5.50)        | 0 (0)                    | 0 (0)                   | –                       |
| <b>Myocardial infarction*</b> |                       |                         |                         |                          |                         |                         |
| <b>Any dose</b>               | <b>56 (31.6)</b>      | <b>72 (29.4)</b>        | <b>2.29 (1.16–4.51)</b> | <b>51 (28.8)</b>         | <b>82 (33.5)</b>        | <b>2.11 (1.05–4.22)</b> |
| Appropriate dose              | 39 (22.3)             | 47 (19.2)               | 2.68 (1.29–5.59)        | 36 (20.6)                | 65 (26.5)               | 1.79 (0.86–3.75)        |
| Inappropriate dose            | 17 (9.7)              | 25 (10.2)               | 1.65 (0.66–4.15)        | 13 (7.4)                 | 17 (6.9)                | 2.78 (1.01–7.62)        |
| <b>Standard dose</b>          | <b>23 (13.1)</b>      | <b>33 (13.5)</b>        | <b>2.15 (0.95–4.84)</b> | <b>24 (13.7)</b>         | <b>47 (19.2)</b>        | <b>1.93 (0.87–4.25)</b> |
| Appropriate dose              | 20 (11.4)             | 30 (12.2)               | 2.02 (0.87–4.71)        | 18 (10.3)                | 39 (15.9)               | 1.64 (0.69–3.86)        |
| Inappropriate dose            | 3 (1.7)               | 3 (1.2)                 | 3.13 (0.49–19.90)       | 6 (3.4)                  | 8 (3.3)                 | 3.32 (0.89–12.34)       |
| <b>Reduced dose</b>           | <b>33 (18.9)</b>      | <b>39 (15.9)</b>        | <b>2.46 (1.12–5.39)</b> | <b>25 (14.3)</b>         | <b>35 (14.3)</b>        | <b>2.17 (0.93–5.05)</b> |
| Appropriate dose              | 19 (10.9)             | 17 (6.9)                | 4.06 (1.55–10.65)       | 18 (10.3)                | 26 (10.6)               | 2.05 (0.81–5.24)        |
| Inappropriate dose            | 14 (8)                | 22 (9)                  | 1.47 (0.55–3.92)        | 7 (4)                    | 9 (3.7)                 | 2.46 (0.65–9.26)        |
| <b>All-cause mortality†</b>   |                       |                         |                         |                          |                         |                         |
| <b>Any dose</b>               | <b>572 (27.8)</b>     | <b>416 (33)</b>         | <b>1.10 (0.87–1.39)</b> | <b>537 (26.1)</b>        | <b>381 (30.2)</b>       | <b>1.31 (1.03–1.66)</b> |
| Appropriate dose              | 349 (17)              | 270 (21.4)              | 1.03 (0.79–1.33)        | 352 (17.2)               | 273 (21.7)              | 1.16 (0.90–1.50)        |
| Inappropriate dose            | 221 (10.8)            | 146 (11.6)              | 1.23 (0.91–1.66)        | 180 (8.8)                | 103 (8.2)               | 1.76 (1.27–2.45)        |
| <b>Standard dose</b>          | <b>187 (9.1)</b>      | <b>161 (12.8)</b>       | <b>0.89 (0.66–1.20)</b> | <b>242 (11.8)</b>        | <b>193 (15.3)</b>       | <b>1.16 (0.87–1.54)</b> |
| Appropriate dose              | 147 (7.2)             | 144 (11.4)              | 0.81 (0.59–1.11)        | 189 (9.2)                | 152 (12.1)              | 1.13 (0.83–1.53)        |
| Inappropriate dose            | 40 (1.9)              | 17 (1.3)                | 1.46 (0.77–2.75)        | 53 (2.6)                 | 41 (3.3)                | 1.30 (0.80–2.12)        |
| <b>Reduced dose</b>           | <b>383 (18.7)</b>     | <b>255 (20.2)</b>       | <b>1.23 (0.95–1.60)</b> | <b>290 (14.1)</b>        | <b>183 (14.5)</b>       | <b>1.48 (1.12–1.95)</b> |
| Appropriate dose              | 202 (9.8)             | 126 (10)                | 1.29 (0.94–1.77)        | 163 (7.9)                | 121 (9.6)               | 1.20 (0.87–1.65)        |
| Inappropriate dose            | 181 (8.8)             | 129 (10.2)              | 1.19 (0.87–1.63)        | 127 (6.2)                | 62 (4.9)                | 2.08 (1.42–3.05)        |

\*ORs were adjusted for matching factors (naive at start date, sex, and year of birth), frailty, health services utilization (hospitalizations, referrals), BMI, alcohol abuse, poly medication, history of ischemic stroke, myocardial infarction, peripheral artery disease, tachycardia, hyperlipidaemia, gastrointestinal diseases, osteoarthritis, asthma, obesity, and use of gastroprotective drugs, antiplatelets, other anticoagulants, oral antidiabetics, anti-infectives, and antipsychotics.

†ORs were adjusted for matching factors (naive at start date, sex, and year of birth), frailty, hospitalizations in the year before the index date, BMI, history of haemorrhagic stroke, osteoarthritis, asthma, Parkinson's disease, dementia/psychosis, and use of gastroprotective drugs, antidepressants, injectable steroids, and digoxin. ‡ORs were adjusted for matching factors (naive at start date, sex, and year of birth), poly medication, frailty, health services utilization, alcohol, BMI, history of heart failure, cancer, peripheral artery disease, stroke, myocardial infarction, and use of oral steroids, statins, antihypertensives, parenteral anticoagulants, other DOAC, digoxin, and CYP-inducing drugs

BMI, body mass index; CI, confidence interval; CYP, cytochrome P450; DOAC, direct oral anticoagulant; OR, odds ratio

**Supplementary Table 10.** ORs (95% CI) for the risk of study outcomes, associated with apixaban vs. warfarin and with rivaroxaban vs. warfarin, according to dose classification, among individuals without missing data on eGFR or BMI.

|                                           | Apixaban vs. warfarin |                         |                         | Rivaroxaban vs. warfarin |                         |                         |
|-------------------------------------------|-----------------------|-------------------------|-------------------------|--------------------------|-------------------------|-------------------------|
|                                           | Exposed cases, n (%)  | Exposed controls, n (%) | OR (95% CI)             | Exposed cases, n (%)     | Exposed controls, n (%) | OR (95% CI)             |
| <b>Ischemic stroke/systemic embolism*</b> |                       |                         |                         |                          |                         |                         |
| <b>Any dose</b>                           | <b>167 (23.7)</b>     | <b>522 (24.8)</b>       | <b>1.13 (0.88–1.45)</b> | <b>155 (22.0)</b>        | <b>546 (26.0)</b>       | <b>1.00 (0.78–1.29)</b> |
| Appropriate dose                          | 129 (18.4)            | 394 (18.7)              | 1.16 (0.89–1.52)        | 122 (17.4)               | 474 (22.5)              | 0.92 (0.70–1.21)        |
| Inappropriate dose                        | 38 (5.4)              | 128 (6.1)               | 1.04 (0.68–1.58)        | 31 (4.4)                 | 72 (3.4)                | 1.37 (0.85–2.21)        |
| <b>Standard dose</b>                      | <b>112 (16.0)</b>     | <b>317 (15.1)</b>       | <b>1.29 (0.97–1.70)</b> | <b>111 (15.8)</b>        | <b>415 (19.7)</b>       | <b>0.94 (0.71–1.25)</b> |
| Appropriate dose                          | 104 (14.8)            | 306 (14.6)              | 1.25 (0.94–1.66)        | 97 (13.8)                | 379 (18.0)              | 0.91 (0.68–1.22)        |
| Inappropriate dose                        | 8 (1.1)               | 11 (0.5)                | 2.42 (0.90–6.51)        | 14 (2.0)                 | 36 (1.7)                | 1.28 (0.66–2.47)        |
| <b>Reduced dose</b>                       | <b>55 (7.8)</b>       | <b>205 (9.8)</b>        | <b>0.90 (0.63–1.29)</b> | <b>42 (6.0)</b>          | <b>131 (6.2)</b>        | <b>1.11 (0.74–1.68)</b> |
| Appropriate dose                          | 25 (3.6)              | 88 (4.2)                | 0.91 (0.55–1.51)        | 25 (3.6)                 | 95 (4.5)                | 0.98 (0.60–1.61)        |
| Inappropriate dose                        | 30 (4.3)              | 117 (5.6)               | 0.90 (0.57–1.42)        | 17 (2.4)                 | 36 (1.7)                | 1.46 (0.77–2.77)        |
| <b>Intracranial bleeding†</b>             |                       |                         |                         |                          |                         |                         |
| <b>Any dose</b>                           | <b>48 (20.3)</b>      | <b>236 (24.3)</b>       | <b>0.58 (0.38–0.89)</b> | <b>53 (22.4)</b>         | <b>233 (24.0)</b>       | <b>0.74 (0.49–1.12)</b> |
| Appropriate dose                          | 40 (16.9)             | 186 (19.2)              | 0.62 (0.40–0.97)        | 43 (18.1)                | 199 (20.5)              | 0.71 (0.46–1.09)        |
| Inappropriate dose                        | 8 (3.4)               | 50 (5.1)                | 0.45 (0.19–1.03)        | 10 (4.2)                 | 34 (3.5)                | 0.91 (0.41–2.01)        |
| <b>Standard dose</b>                      | <b>28 (11.8)</b>      | <b>152 (15.7)</b>       | <b>0.55 (0.33–0.91)</b> | <b>34 (14.3)</b>         | <b>157 (16.2)</b>       | <b>0.73 (0.45–1.16)</b> |
| Appropriate dose                          | 27 (11.4)             | 145 (14.9)              | 0.57 (0.35–0.95)        | 31 (13.1)                | 147 (15.1)              | 0.70 (0.43–1.14)        |
| Inappropriate dose                        | 1 (0.4)               | 7 (0.7)                 | 0.21 (0.02–1.94)        | 3 (1.3)                  | 10 (1.0)                | 1.04 (0.26–4.13)        |
| <b>Reduced dose</b>                       | <b>20 (8.4)</b>       | <b>84 (8.7)</b>         | <b>0.64 (0.35–1.17)</b> | <b>19 (8.0)</b>          | <b>76 (7.8)</b>         | <b>0.78 (0.43–1.41)</b> |
| Appropriate dose                          | 13 (5.5)              | 41 (4.2)                | 0.73 (0.35–1.53)        | 12 (5.1)                 | 52 (5.4)                | 0.73 (0.36–1.47)        |
| Inappropriate dose                        | 7 (3.0)               | 43 (4.4)                | 0.52 (0.22–1.25)        | 7 (3.0)                  | 24 (2.5)                | 0.87 (0.34–2.20)        |
| <b>Haemorrhagic stroke†</b>               |                       |                         |                         |                          |                         |                         |
| <b>Any dose</b>                           | <b>28 (20.6)</b>      | <b>127 (22.5)</b>       | <b>0.71 (0.41–1.24)</b> | <b>35 (25.7)</b>         | <b>136 (24.1)</b>       | <b>0.98 (0.57–1.66)</b> |
| Appropriate dose                          | 24 (17.6)             | 103 (18.3)              | 0.77 (0.43–1.38)        | 27 (19.9)                | 119 (21.1)              | 0.83 (0.47–1.47)        |
| Inappropriate dose                        | 4 (2.9)               | 24 (4.3)                | 0.46 (0.14–1.53)        | 8 (5.9)                  | 17 (3.0)                | 2.03 (0.78–5.27)        |
| <b>Standard dose</b>                      | <b>18 (13.2)</b>      | <b>87 (15.4)</b>        | <b>0.75 (0.39–1.42)</b> | <b>23 (16.9)</b>         | <b>98 (17.4)</b>        | <b>0.92 (0.50–1.66)</b> |
| Appropriate dose                          | 18 (13.2)             | 83 (14.8)               | 0.80 (0.42–1.52)        | 20 (14.7)                | 95 (17.0)               | 0.79 (0.43–1.48)        |
| Inappropriate dose                        | 0                     | 0                       | –                       | 3 (2.2)                  | 3 (0.5)                 | 5.20 (0.92–29.37)       |
| <b>Reduced dose</b>                       | <b>10 (7.4)</b>       | <b>40 (7.1)</b>         | <b>0.66 (0.28–1.52)</b> | <b>12 (8.8)</b>          | <b>38 (6.7)</b>         | <b>1.13 (0.52–2.46)</b> |
| Appropriate dose                          | 6 (4.4)               | 20 (3.6)                | 0.66 (0.23–1.90)        | 7 (5.1)                  | 24 (4.3)                | 0.93 (0.36–2.46)        |

|                               | Apixaban vs. warfarin |                         |                         | Rivaroxaban vs. warfarin |                         |                         |
|-------------------------------|-----------------------|-------------------------|-------------------------|--------------------------|-------------------------|-------------------------|
|                               | Exposed cases, n (%)  | Exposed controls, n (%) | OR (95% CI)             | Exposed cases, n (%)     | Exposed controls, n (%) | OR (95% CI)             |
| Inappropriate dose            | 4 (2.9)               | 20 (3.6)                | 0.60 (0.18–2.01)        | 5 (3.7)                  | 14 (2.5)                | 1.42 (0.45–4.45)        |
| <b>Myocardial infarction*</b> |                       |                         |                         |                          |                         |                         |
| <b>Any dose</b>               | <b>157 (29.0)</b>     | <b>393 (25.9)</b>       | <b>1.45 (1.08–1.95)</b> | <b>148 (27.4)</b>        | <b>402 (26.4)</b>       | <b>1.36 (1.00–1.83)</b> |
| Appropriate dose              | 115 (21.3)            | 307 (20.2)              | 1.36 (0.99–1.87)        | 108 (20.0)               | 333 (21.9)              | 1.25 (0.91–1.73)        |
| Inappropriate dose            | 42 (7.8)              | 85 (5.6)                | 1.84 (1.15–2.96)        | 36 (6.7)                 | 66 (4.3)                | 1.75 (1.07–2.87)        |
| <b>Standard dose</b>          | <b>95 (17.6)</b>      | <b>255 (16.8)</b>       | <b>1.40 (1.00–1.95)</b> | <b>89 (16.5)</b>         | <b>300 (19.7)</b>       | <b>1.19 (0.85–1.67)</b> |
| Appropriate dose              | 89 (16.5)             | 249 (16.4)              | 1.33 (0.95–1.87)        | 73 (13.5)                | 271 (17.8)              | 1.11 (0.78–1.58)        |
| Inappropriate dose            | 6 (1.1)               | 6 (0.4)                 | 3.38 (0.98–11.67)       | 16 (3.0)                 | 29 (1.9)                | 1.79 (0.89–3.60)        |
| <b>Reduced dose</b>           | <b>62 (11.5)</b>      | <b>137 (9.0)</b>        | <b>1.60 (1.06–2.41)</b> | <b>55 (10.2)</b>         | <b>99 (6.5)</b>         | <b>1.77 (1.15–2.72)</b> |
| Appropriate dose              | 26 (4.8)              | 58 (3.8)                | 1.46 (0.83–2.58)        | 35 (6.5)                 | 62 (4.1)                | 1.79 (1.07–3.01)        |
| Inappropriate dose            | 36 (6.7)              | 79 (5.2)                | 1.74 (1.06–2.88)        | 20 (3.7)                 | 37 (2.4)                | 1.77 (0.94–3.32)        |
| <b>All-cause mortality†</b>   |                       |                         |                         |                          |                         |                         |
| <b>Any dose</b>               | <b>1424 (23.6)</b>    | <b>1604 (27.1)</b>      | <b>1.17 (1.04–1.32)</b> | <b>1428 (23.7)</b>       | <b>1616 (27.3)</b>      | <b>1.32 (1.17–1.49)</b> |
| Appropriate dose              | 934 (15.5)            | 1174 (19.8)             | 1.07 (0.94–1.22)        | 1051 (17.4)              | 1280 (21.6)             | 1.27 (1.12–1.45)        |
| Inappropriate dose            | 488 (8.1)             | 430 (7.3)               | 1.42 (1.20–1.69)        | 365 (6.0)                | 322 (5.4)               | 1.50 (1.23–1.81)        |
| <b>Standard dose</b>          | <b>601 (10.0)</b>     | <b>896 (15.1)</b>       | <b>0.97 (0.83–1.12)</b> | <b>825 (13.7)</b>        | <b>1126 (19.0)</b>      | <b>1.21 (1.06–1.38)</b> |
| Appropriate dose              | 522 (8.7)             | 845 (14.3)              | 0.92 (0.79–1.07)        | 676 (11.2)               | 975 (16.4)              | 1.17 (1.01–1.35)        |
| Inappropriate dose            | 79 (1.3)              | 51 (0.9)                | 1.54 (1.03–2.31)        | 149 (2.5)                | 151 (2.5)               | 1.43 (1.10–1.87)        |
| <b>Reduced dose</b>           | <b>821 (13.6)</b>     | <b>708 (11.9)</b>       | <b>1.41 (1.22–1.64)</b> | <b>591 (9.8)</b>         | <b>476 (8.0)</b>        | <b>1.58 (1.34–1.86)</b> |
| Appropriate dose              | 412 (6.8)             | 329 (5.5)               | 1.41 (1.16–1.70)        | 375 (6.2)                | 305 (5.1)               | 1.57 (1.30–1.91)        |
| Inappropriate dose            | 409 (6.8)             | 379 (6.4)               | 1.43 (1.19–1.72)        | 216 (3.6)                | 171 (2.9)               | 1.60 (1.25–2.05)        |

\*ORs were adjusted for matching factors (naive at start date, sex, and year of birth), frailty, health services utilization (hospitalizations, referrals), BMI, alcohol abuse, poly medication, history of ischemic stroke, myocardial infarction, peripheral artery disease, tachycardia, hyperlipidaemia, gastrointestinal diseases, osteoarthritis, asthma, obesity, and use of gastroprotective drugs, antiplatelets, other anticoagulants, oral antidiabetics, anti-infectives, and antipsychotics.

†ORs were adjusted for matching factors (naive at start date, sex, and year of birth), frailty, hospitalizations in the year before the index date, BMI, history of haemorrhagic stroke, osteoarthritis, asthma, Parkinson's disease, dementia/psychosis, and use of gastroprotective drugs, antidepressants, injectable steroids, and digoxin.

‡ORs were adjusted for matching factors (naive at start date, sex, and year of birth), poly medication, frailty, health services utilization (hospitalizations, referrals), alcohol, BMI, history of peripheral artery disease, ischemic stroke, myocardial infarction, tachycardia,

hyperlipidemia, gastrointestinal diseases, osteoarthritis, asthma, obesity, and use of gastroprotective drugs, antiplatelets, other anticoagulants, oral antidiabetics, anti-infectives, and antipsychotics.

BMI, body mass index; CI, confidence interval; eGFR, estimated glomerular filtration rate; OR, odds ratio
